# Supplementary material
Source: PubMed Central journal article supplement (PMC4554965)
Supplement: NIHMS697711-supplement.pdf [file NIHMS697711-supplement.pdf]

## Appendix 1. Genes that were differentially expressed in CD4+ T cells.

| Gene_Symbol         | P value | FC (log2) | Transcript_Cluster_ID |
|---------------------|---------|-----------|-----------------------|
| <b>Up-regulated</b> |         |           |                       |
| Mcm10               | 0.0000  | 0.66      | 17381306              |
| Ncapd2              | 0.0003  | 0.61      | 17471023              |
| Mcm5                | 0.0004  | 0.62      | 17502583              |
| Mir466n             | 0.0005  | 0.66      | 17366926              |
| 5730590G19Rik       | 0.0006  | 0.84      | 17479425              |
| Gm19281             | 0.0006  | 0.63      | 17547777              |
| Kif23               | 0.0007  | 0.69      | 17527934              |
| Cxcr6               | 0.0008  | 0.89      | 17523642              |
| Plk1                | 0.0009  | 0.83      | 17482739              |
| Cenpn               | 0.0010  | 0.63      | 17505913              |
| Bard1               | 0.0012  | 0.66      | 17223999              |
| Bub1                | 0.0013  | 0.97      | 17391376              |
| Hist1h2bk           | 0.0013  | 0.86      | 17285742              |
| Kif20a              | 0.0013  | 0.72      | 17349433              |
| Nusap1              | 0.0014  | 0.69      | 17374833              |
| Pbk                 | 0.0015  | 0.71      | 17301428              |
| Prr11               | 0.0016  | 0.85      | 17267454              |
| Nuf2                | 0.0016  | 0.68      | 17229433              |
| Igsf9b              | 0.0016  | 0.66      | 17515617              |
| Klrb1f              | 0.0017  | 0.72      | 17463482              |
| Adam19              | 0.0019  | 0.70      | 17248754              |
| Il12rb1             | 0.0020  | 0.77      | 17502051              |
| Casc5               | 0.0024  | 0.75      | 17374692              |
| Spag5               | 0.0026  | 0.90      | 17253570              |
| Kif15               | 0.0028  | 0.67      | 17523494              |
| Stil                | 0.0029  | 0.76      | 17417117              |
| Ube2c               | 0.0031  | 0.69      | 17379523              |
| E2f8                | 0.0032  | 0.87      | 17491378              |
| Dtl                 | 0.0032  | 0.64      | 17231066              |
| F630043A04Rik       | 0.0033  | 0.72      | 17307203              |
| Slamf1              | 0.0035  | 0.69      | 17219407              |
| Kif4                | 0.0035  | 0.63      | 17536566              |
| Il2ra               | 0.0037  | 0.63      | 17366992              |
| Prc1                | 0.0038  | 0.72      | 17479575              |
| Gpr68               | 0.0040  | 0.78      | 17283293              |
| Crmp1               | 0.0042  | 0.80      | 17436999              |
| Kif18b              | 0.0043  | 0.93      | 17270369              |
| Klk1b9              | 0.0046  | 0.72      | 17477306              |
| Ttk                 | 0.0047  | 0.65      | 17519910              |
| A630038E17Rik       | 0.0048  | 0.60      | 17300127              |
| Ttc39c              | 0.0048  | 0.67      | 17348570              |
| Pole                | 0.0050  | 0.71      | 17440465              |
| Ccna2               | 0.0050  | 0.78      | 17404821              |

|               |        |      |          |
|---------------|--------|------|----------|
| B4galnt4      | 0.0055 | 1.10 | 17484710 |
| AA467197      | 0.0057 | 0.63 | 17375503 |
| Cenpk         | 0.0057 | 1.00 | 17289584 |
| 2810417H13Rik | 0.0058 | 0.61 | 17518636 |
| Mir5104       | 0.0063 | 0.71 | 17231600 |
| Gm19703       | 0.0064 | 0.69 | 17547821 |
| Ncapg         | 0.0065 | 0.65 | 17437278 |
| Hmmr          | 0.0065 | 0.63 | 17261840 |
| Ctsw          | 0.0065 | 0.76 | 17361605 |
| Tk1           | 0.0068 | 0.65 | 17272594 |
| Esco2         | 0.0072 | 0.86 | 17307774 |
| Mki67         | 0.0072 | 0.90 | 17497334 |
| Osbpl3        | 0.0073 | 0.70 | 17466687 |
| Cenpe         | 0.0073 | 0.74 | 17402797 |
| Dlgap5        | 0.0074 | 0.62 | 17305789 |
| Sh2d2a        | 0.0075 | 0.63 | 17398853 |
| Depdc1a       | 0.0076 | 0.79 | 17403919 |
| Mybl2         | 0.0078 | 0.72 | 17379206 |
| 2610318N02Rik | 0.0086 | 0.68 | 17328610 |
| Atp2b4        | 0.0091 | 0.76 | 17227037 |
| Mis18bp1      | 0.0093 | 0.77 | 17281428 |
| Kif22         | 0.0094 | 0.66 | 17496568 |
| Ncapg2        | 0.0103 | 0.68 | 17279608 |
| Cxcr3         | 0.0105 | 0.67 | 17543625 |
| Sv2c          | 0.0106 | 0.65 | 17295177 |
| Kif11         | 0.0106 | 0.80 | 17359020 |
| Pdcd1lg2      | 0.0113 | 0.62 | 17358552 |
| Neb           | 0.0115 | 0.70 | 17385099 |
| Adam8         | 0.0116 | 0.96 | 17497525 |
| Top2a         | 0.0117 | 0.67 | 17268909 |
| Tarm1         | 0.0118 | 0.93 | 17485510 |
| Ccr3          | 0.0120 | 0.70 | 17523646 |
| Sytl3         | 0.0122 | 0.70 | 17332932 |
| Pdcd1         | 0.0126 | 0.83 | 17225801 |
| Sytl3         | 0.0127 | 0.75 | 17340532 |
| Oas3          | 0.0136 | 0.61 | 17452070 |
| Gzmb          | 0.0140 | 1.61 | 17307033 |
| Gm6637        | 0.0140 | 0.82 | 17462644 |
| Shcbp1        | 0.0143 | 0.78 | 17507288 |
| Fam64a        | 0.0144 | 0.61 | 17252310 |
| Nkg7          | 0.0147 | 0.73 | 17477101 |
| Mir1948       | 0.0151 | 1.18 | 17348589 |
| 4930547N16Rik | 0.0156 | 0.65 | 17243850 |
| Ifng          | 0.0160 | 0.82 | 17237589 |
| Hells         | 0.0167 | 0.79 | 17359212 |
| Itgae         | 0.0180 | 0.67 | 17252574 |
| Sfn8          | 0.0181 | 0.64 | 17266861 |
| Gpr25         | 0.0189 | 1.18 | 17227480 |
| Klrg1         | 0.0194 | 0.89 | 17470533 |

|               |        |      |          |
|---------------|--------|------|----------|
| Gm20262       | 0.0197 | 0.77 | 17547493 |
| Gm11435       | 0.0213 | 0.75 | 17266928 |
| Rgs1          | 0.0216 | 0.68 | 17227780 |
| Rad54l        | 0.0228 | 0.67 | 17428553 |
| LOC100505156  | 0.0232 | 0.67 | 17419058 |
| Mir1933       | 0.0232 | 0.67 | 17260931 |
| Mybl1         | 0.0247 | 0.68 | 17221158 |
| Ccr8          | 0.0264 | 0.94 | 17523158 |
| Ccr4          | 0.0266 | 0.71 | 17531887 |
| Apol7c        | 0.0278 | 0.97 | 17318794 |
| Gm13238       | 0.0281 | 0.80 | 17421390 |
| Tnfrsf8       | 0.0283 | 0.63 | 17432687 |
| Gpr52         | 0.0284 | 0.97 | 17228790 |
| Tbx21         | 0.0292 | 0.69 | 17268445 |
| Il18rap       | 0.0306 | 0.80 | 17212252 |
| Chst2         | 0.0312 | 0.65 | 17529708 |
| Atad5         | 0.0329 | 0.63 | 17253858 |
| Ccr2          | 0.0330 | 0.60 | 17523650 |
| Gm20235       | 0.0338 | 0.79 | 17547660 |
| Mir709        | 0.0348 | 0.67 | 17503092 |
| 1500009L16Rik | 0.0383 | 0.75 | 17235990 |
| LOC100503226  | 0.0387 | 0.75 | 17548738 |
| LOC100503226  | 0.0387 | 0.75 | 17548740 |
| LOC100503226  | 0.0387 | 0.75 | 17548742 |
| Ly6g5b        | 0.0409 | 0.87 | 17344216 |
| Gm19279       | 0.0414 | 0.94 | 17548763 |
| Sp100         | 0.0432 | 0.83 | 17214979 |
| A330049M08Rik | 0.0463 | 0.62 | 17431429 |
| Plekhf1       | 0.0497 | 0.61 | 17489905 |

**Down-regulated**

|        |        |       |          |
|--------|--------|-------|----------|
| Lama2  | 0.0000 | -1.01 | 17239919 |
| Hey1   | 0.0000 | -1.01 | 17404011 |
| Car14  | 0.0000 | -1.06 | 17407956 |
| Acer2  | 0.0000 | -1.25 | 17415219 |
| Nsg1   | 0.0000 | -1.08 | 17447615 |
| Mapt   | 0.0000 | -1.06 | 17257197 |
| Edn1   | 0.0000 | -1.59 | 17286830 |
| Cnn3   | 0.0000 | -0.85 | 17402155 |
| Ecsr   | 0.0000 | -1.09 | 17353650 |
| Ppap2a | 0.0000 | -1.51 | 17289928 |
| Hpgd   | 0.0000 | -1.20 | 17501250 |
| Syne1  | 0.0001 | -1.04 | 17238936 |
| Ccbp2  | 0.0001 | -0.96 | 17523371 |
| Syne1  | 0.0001 | -0.63 | 17238908 |
| Map4k5 | 0.0001 | -0.60 | 17281637 |
| Foxf1  | 0.0001 | -1.23 | 17506291 |
| Sema3c | 0.0001 | -1.49 | 17434973 |
| Ly6c1  | 0.0001 | -1.13 | 17318089 |

|               |        |       |          |
|---------------|--------|-------|----------|
| Fam55d        | 0.0001 | -1.34 | 17516978 |
| Gsta3         | 0.0001 | -1.30 | 17211405 |
| Kit           | 0.0001 | -1.30 | 17438272 |
| Ocln          | 0.0001 | -1.02 | 17295670 |
| Tek           | 0.0001 | -1.54 | 17415469 |
| Col4a1        | 0.0001 | -0.76 | 17507377 |
| Dach1         | 0.0001 | -1.02 | 17309041 |
| Fzd6          | 0.0001 | -1.17 | 17311179 |
| Igfbp3        | 0.0001 | -1.18 | 17260474 |
| Plat          | 0.0001 | -1.07 | 17499962 |
| Casc4         | 0.0001 | -1.11 | 17375327 |
| Plvap         | 0.0001 | -1.59 | 17510338 |
| Pecam1        | 0.0001 | -0.67 | 17270937 |
| Hspa12b       | 0.0001 | -0.94 | 17376423 |
| Col4a2        | 0.0001 | -0.83 | 17498962 |
| Arhgap29      | 0.0001 | -1.29 | 17402193 |
| Lama4         | 0.0002 | -1.28 | 17232593 |
| Ptk2          | 0.0002 | -1.06 | 17317858 |
| Nos3          | 0.0002 | -0.64 | 17435282 |
| Adcy2         | 0.0002 | -0.66 | 17294086 |
| Pde3a         | 0.0002 | -1.16 | 17464040 |
| Rasip1        | 0.0002 | -1.26 | 17477930 |
| Wfdc1         | 0.0002 | -1.38 | 17506137 |
| Pllp          | 0.0002 | -1.18 | 17511878 |
| Adh1          | 0.0002 | -1.08 | 17403070 |
| Gjc1          | 0.0002 | -0.72 | 17270315 |
| Asap2         | 0.0002 | -0.80 | 17274415 |
| Aldh1a1       | 0.0002 | -1.52 | 17358103 |
| Jup           | 0.0002 | -1.03 | 17269464 |
| E030019B13Rik | 0.0002 | -0.67 | 17281291 |
| Ctsl          | 0.0002 | -0.78 | 17293706 |
| Cd34          | 0.0002 | -1.30 | 17221014 |
| Hoxa5         | 0.0002 | -1.30 | 17466833 |
| Rasgef1a      | 0.0002 | -1.34 | 17462202 |
| Scn7a         | 0.0002 | -1.40 | 17386090 |
| Ptpm          | 0.0002 | -1.37 | 17346856 |
| Dennd5b       | 0.0002 | -1.03 | 17473061 |
| Rhoj          | 0.0002 | -1.43 | 17276386 |
| Gucy1b3       | 0.0002 | -1.45 | 17406205 |
| Notch4        | 0.0002 | -0.97 | 17336559 |
| Pard6g        | 0.0002 | -0.71 | 17352120 |
| Eml1          | 0.0002 | -1.23 | 17278561 |
| Smad6         | 0.0002 | -1.31 | 17528125 |
| Ripply3       | 0.0003 | -1.45 | 17327364 |
| Cdc42ep1      | 0.0003 | -1.26 | 17312774 |
| Tmem100       | 0.0003 | -1.50 | 17255058 |
| Pde8b         | 0.0003 | -0.96 | 17295059 |
| 6430548M08Rik | 0.0003 | -1.00 | 17506230 |
| Gkap1         | 0.0003 | -0.78 | 17293103 |

|               |        |       |          |
|---------------|--------|-------|----------|
| Id3           | 0.0003 | -0.85 | 17420016 |
| Ism1          | 0.0003 | -1.02 | 17376908 |
| Synm          | 0.0003 | -0.66 | 17492018 |
| Thbd          | 0.0003 | -1.36 | 17392568 |
| Gpihbp1       | 0.0003 | -1.38 | 17312236 |
| Adamts8       | 0.0003 | -0.95 | 17515703 |
| Stmn2         | 0.0003 | -1.36 | 17396024 |
| Ephb4         | 0.0004 | -1.49 | 17443539 |
| Postn         | 0.0004 | -1.46 | 17397575 |
| Eltld1        | 0.0004 | -1.58 | 17403605 |
| Ldb2          | 0.0004 | -1.44 | 17447884 |
| Lrp6          | 0.0004 | -0.84 | 17548528 |
| Ccdc85a       | 0.0004 | -0.95 | 17261233 |
| Nipal2        | 0.0004 | -1.36 | 17316402 |
| Gpr125        | 0.0004 | -1.10 | 17447979 |
| Rgmb          | 0.0004 | -0.67 | 17341231 |
| Pxdn          | 0.0004 | -1.38 | 17274703 |
| Inpp5a        | 0.0004 | -0.75 | 17484382 |
| Sox18         | 0.0004 | -1.43 | 17395928 |
| Tuba1a        | 0.0004 | -0.78 | 17321474 |
| Adcy4         | 0.0004 | -1.41 | 17306877 |
| Ntn4          | 0.0004 | -1.39 | 17236604 |
| Galnt14       | 0.0005 | -1.32 | 17495172 |
| Akap12        | 0.0005 | -0.78 | 17231423 |
| Gpc3          | 0.0005 | -1.37 | 17541681 |
| Rapgef5       | 0.0005 | -1.02 | 17279670 |
| Cd36          | 0.0005 | -1.03 | 17445715 |
| Fkbp9         | 0.0005 | -1.13 | 17458911 |
| Fmo1          | 0.0005 | -1.18 | 17229020 |
| Egfl7         | 0.0005 | -1.32 | 17368330 |
| Calcr1        | 0.0005 | -0.92 | 17387385 |
| Tcf21         | 0.0005 | -1.58 | 17239714 |
| Fam38b        | 0.0005 | -1.19 | 17354906 |
| Pcdh1         | 0.0005 | -0.86 | 17353923 |
| Meox2         | 0.0005 | -0.94 | 17275062 |
| Crim1         | 0.0005 | -0.63 | 17339801 |
| 9430020K01Rik | 0.0005 | -1.28 | 17348138 |
| Rbp1          | 0.0005 | -1.24 | 17520624 |
| Aplnr         | 0.0005 | -1.40 | 17372725 |
| Syne1         | 0.0005 | -0.95 | 17238912 |
| B4galt4       | 0.0005 | -1.06 | 17325637 |
| Cpne8         | 0.0005 | -0.87 | 17320583 |
| Clic5         | 0.0005 | -1.36 | 17337852 |
| Myo10         | 0.0005 | -0.94 | 17310589 |
| Unc13b        | 0.0005 | -0.83 | 17413221 |
| Pde9a         | 0.0005 | -1.23 | 17335842 |
| Hmcn1         | 0.0006 | -1.13 | 17227910 |
| Afap1l1       | 0.0006 | -1.36 | 17354810 |
| Sdpr          | 0.0006 | -1.44 | 17212719 |

|               |        |       |          |
|---------------|--------|-------|----------|
| Sparc         | 0.0006 | -1.25 | 17262990 |
| Adamts9       | 0.0006 | -1.20 | 17469136 |
| Jag2          | 0.0006 | -0.76 | 17284253 |
| Disp2         | 0.0006 | -0.83 | 17374618 |
| Rgs6          | 0.0006 | -0.71 | 17277017 |
| Cxcl14        | 0.0006 | -1.00 | 17293006 |
| Myo1d         | 0.0006 | -0.99 | 17266698 |
| Pdgfd         | 0.0006 | -1.16 | 17514460 |
| Tspan6        | 0.0006 | -0.87 | 17544385 |
| Tm4sf1        | 0.0006 | -1.37 | 17405355 |
| Tmtc2         | 0.0006 | -1.12 | 17244661 |
| Sema3g        | 0.0006 | -1.18 | 17298387 |
| Sgce          | 0.0006 | -1.19 | 17464588 |
| Kank3         | 0.0006 | -0.73 | 17336175 |
| Layn          | 0.0006 | -1.18 | 17526956 |
| Prkcdbp       | 0.0006 | -0.82 | 17494503 |
| Cd200         | 0.0006 | -0.75 | 17330625 |
| Car2          | 0.0006 | -1.06 | 17396162 |
| Clec12b       | 0.0006 | -0.73 | 17471518 |
| Nedd4         | 0.0006 | -1.11 | 17519184 |
| Igfbp7        | 0.0006 | -1.09 | 17449084 |
| Igfbp5        | 0.0006 | -0.84 | 17224180 |
| 1110021L09Rik | 0.0007 | -0.79 | 17232135 |
| Tmem2         | 0.0007 | -0.91 | 17358138 |
| Grb10         | 0.0007 | -1.09 | 17260668 |
| Arhgef15      | 0.0007 | -1.11 | 17264448 |
| Gpx8          | 0.0007 | -1.07 | 17296281 |
| Lphn2         | 0.0007 | -1.10 | 17411103 |
| Sh3tc2        | 0.0007 | -0.77 | 17351143 |
| Mtus1         | 0.0007 | -0.90 | 17508907 |
| Lipg          | 0.0007 | -1.58 | 17355443 |
| Clstn2        | 0.0007 | -1.33 | 17529930 |
| Myo6          | 0.0007 | -1.06 | 17519821 |
| LOC545261     | 0.0007 | -0.62 | 17351133 |
| Srgap1        | 0.0007 | -0.62 | 17245539 |
| Tmem178       | 0.0008 | -1.36 | 17339967 |
| Maoa          | 0.0008 | -1.14 | 17533474 |
| Pde5a         | 0.0008 | -1.38 | 17402321 |
| Prkg1         | 0.0008 | -1.37 | 17363903 |
| Efnb2         | 0.0008 | -1.36 | 17507321 |
| Zfp532        | 0.0008 | -0.89 | 17351351 |
| Pik3r3        | 0.0008 | -1.02 | 17417407 |
| Npr1          | 0.0008 | -1.03 | 17407306 |
| Ankrd33b      | 0.0008 | -1.06 | 17316280 |
| Atp6v0e2      | 0.0008 | -0.89 | 17458308 |
| Vegfc         | 0.0008 | -0.75 | 17501160 |
| Dll4          | 0.0008 | -1.35 | 17374792 |
| Fam174b       | 0.0008 | -0.76 | 17479183 |
| Kdr           | 0.0008 | -1.38 | 17448924 |

|            |        |       |          |
|------------|--------|-------|----------|
| Acvrl1     | 0.0009 | -0.87 | 17315133 |
| Adcy8      | 0.0009 | -1.33 | 17317533 |
| Vegfa      | 0.0009 | -1.20 | 17345293 |
| She        | 0.0009 | -1.08 | 17399533 |
| Lims2      | 0.0009 | -1.34 | 17349209 |
| Wwtr1      | 0.0009 | -1.09 | 17405365 |
| Plk2       | 0.0009 | -0.95 | 17289794 |
| Prex2      | 0.0009 | -1.41 | 17211131 |
| Emcn       | 0.0009 | -1.34 | 17402981 |
| Cmtm8      | 0.0009 | -1.14 | 17531932 |
| Bmp5       | 0.0009 | -1.34 | 17519538 |
| Fam162b    | 0.0009 | -1.17 | 17240729 |
| Dok4       | 0.0009 | -0.81 | 17511900 |
| Adrb1      | 0.0009 | -0.61 | 17360599 |
| Syne1      | 0.0009 | -1.01 | 17238938 |
| Rbfox2     | 0.0009 | -0.75 | 17318750 |
| Shank3     | 0.0009 | -0.98 | 17314190 |
| Emp2       | 0.0009 | -1.35 | 17328062 |
| Bmp4       | 0.0009 | -1.18 | 17305709 |
| Palmd      | 0.0010 | -1.11 | 17409792 |
| Aqp1       | 0.0010 | -1.44 | 17458813 |
| Fzd4       | 0.0010 | -1.28 | 17480036 |
| Nostrin    | 0.0010 | -1.03 | 17371390 |
| Sparcl1    | 0.0010 | -1.34 | 17450387 |
| Cyp39a1    | 0.0010 | -0.77 | 17337816 |
| Agtr1a     | 0.0010 | -1.10 | 17286271 |
| Map4k3     | 0.0010 | -0.68 | 17347571 |
| Scn3b      | 0.0010 | -1.25 | 17516332 |
| D4Bwg0951e | 0.0010 | -1.22 | 17414984 |
| Wwc2       | 0.0010 | -0.97 | 17509288 |
| Syne1      | 0.0010 | -0.71 | 17238910 |
| Mpdz       | 0.0010 | -0.63 | 17426700 |
| Pam        | 0.0011 | -1.05 | 17225929 |
| Gstk1      | 0.0011 | -0.63 | 17457876 |
| Tfpi       | 0.0011 | -0.79 | 17387407 |
| Slc6a2     | 0.0011 | -1.58 | 17503866 |
| Ednrb      | 0.0011 | -1.28 | 17309268 |
| Myct1      | 0.0011 | -1.54 | 17231477 |
| Myzap      | 0.0011 | -1.31 | 17528673 |
| Grk5       | 0.0011 | -0.98 | 17360890 |
| Enpep      | 0.0011 | -1.45 | 17410251 |
| Cldn5      | 0.0011 | -1.63 | 17323755 |
| D0H4S114   | 0.0011 | -1.05 | 17353370 |
| Syne1      | 0.0011 | -1.05 | 17238922 |
| Foxf2      | 0.0011 | -1.03 | 17286332 |
| Rilpl1     | 0.0011 | -0.70 | 17452861 |
| Tjp1       | 0.0012 | -1.47 | 17491853 |
| Crip2      | 0.0012 | -1.12 | 17279499 |
| Cdh5       | 0.0012 | -0.95 | 17504399 |

|               |        |       |          |
|---------------|--------|-------|----------|
| Colec12       | 0.0012 | -0.88 | 17348282 |
| Prdm8         | 0.0012 | -0.62 | 17439511 |
| Id1           | 0.0012 | -0.95 | 17377778 |
| Rbpms         | 0.0012 | -1.16 | 17508691 |
| Uaca          | 0.0012 | -0.91 | 17518109 |
| Tmeff1        | 0.0012 | -1.01 | 17414017 |
| Fermt2        | 0.0012 | -1.19 | 17305662 |
| Spns2         | 0.0012 | -1.07 | 17265672 |
| Clec1a        | 0.0013 | -1.43 | 17471528 |
| Ager          | 0.0013 | -1.27 | 17336618 |
| Ctnna1        | 0.0013 | -0.72 | 17349520 |
| Npr3          | 0.0013 | -1.48 | 17316043 |
| Mapk12        | 0.0013 | -0.80 | 17320307 |
| Prss23        | 0.0013 | -0.89 | 17493212 |
| Rasal2        | 0.0013 | -0.97 | 17228624 |
| Scel          | 0.0013 | -0.86 | 17302490 |
| Mettl7a1      | 0.0014 | -1.16 | 17315002 |
| Ptprg         | 0.0014 | -1.38 | 17297125 |
| Syne1         | 0.0014 | -0.78 | 17238932 |
| Mal2          | 0.0014 | -1.62 | 17311512 |
| C920021L13Rik | 0.0014 | -1.11 | 17407947 |
| Gpr116        | 0.0014 | -1.18 | 17337770 |
| Cyth3         | 0.0014 | -0.66 | 17444372 |
| Rgs12         | 0.0014 | -0.82 | 17436761 |
| Gucy1a3       | 0.0014 | -1.49 | 17406221 |
| Tmtc1         | 0.0014 | -1.31 | 17472955 |
| Cav2          | 0.0014 | -1.06 | 17456152 |
| Rhbdf1        | 0.0014 | -0.60 | 17261470 |
| Syne1         | 0.0014 | -0.94 | 17238916 |
| Ptgis         | 0.0014 | -0.87 | 17394679 |
| 4930578C19Rik | 0.0014 | -1.07 | 17540436 |
| Hyal2         | 0.0014 | -1.09 | 17521422 |
| Thsd1         | 0.0014 | -0.85 | 17499874 |
| Notch3        | 0.0014 | -0.89 | 17343299 |
| Cald1         | 0.0015 | -0.75 | 17457184 |
| Bcam          | 0.0015 | -1.29 | 17487422 |
| Pknox2        | 0.0015 | -0.73 | 17525561 |
| Erg           | 0.0015 | -1.47 | 17332358 |
| Tbx3          | 0.0015 | -1.34 | 17441595 |
| 1810011O10Rik | 0.0015 | -0.88 | 17508170 |
| Ddah2         | 0.0015 | -1.08 | 17336906 |
| Nkd2          | 0.0015 | -1.02 | 17294289 |
| Amigo2        | 0.0015 | -0.65 | 17320967 |
| Prickle1      | 0.0015 | -0.83 | 17320720 |
| Cdo1          | 0.0015 | -1.25 | 17354282 |
| Mcam          | 0.0015 | -1.20 | 17516518 |
| Ltbp1         | 0.0016 | -0.98 | 17339729 |
| Mmrn2         | 0.0016 | -0.97 | 17298825 |
| Cav1          | 0.0016 | -0.99 | 17456161 |



|               |        |       |          |
|---------------|--------|-------|----------|
| Myo1b         | 0.0016 | -1.10 | 17222837 |
| Limch1        | 0.0016 | -1.27 | 17437887 |
| Sec14l3       | 0.0016 | -1.39 | 17246727 |
| Atp8b1        | 0.0016 | -1.32 | 17355026 |
| Mmp28         | 0.0016 | -0.97 | 17266911 |
| Spats2        | 0.0016 | -0.71 | 17314738 |
| Tmem204       | 0.0017 | -1.20 | 17342133 |
| Cdc42ep2      | 0.0017 | -0.97 | 17361850 |
| Ptprk         | 0.0017 | -1.34 | 17232358 |
| Lrrc61        | 0.0017 | -0.87 | 17466599 |
| Anxa3         | 0.0017 | -1.03 | 17439464 |
| Slc9a3r2      | 0.0017 | -1.18 | 17341963 |
| Itga3         | 0.0017 | -1.07 | 17268137 |
| Fnbp1l        | 0.0018 | -1.14 | 17409963 |
| Rps6ka2       | 0.0018 | -0.79 | 17332974 |
| Clec14a       | 0.0018 | -1.53 | 17281350 |
| Il17rd        | 0.0018 | -0.74 | 17298021 |
| Arhgap42      | 0.0018 | -1.51 | 17523921 |
| Syne1         | 0.0018 | -1.01 | 17238934 |
| Lifr          | 0.0018 | -0.89 | 17310044 |
| Esam          | 0.0018 | -1.38 | 17516074 |
| Kank4         | 0.0018 | -1.02 | 17427476 |
| Cd93          | 0.0018 | -0.99 | 17392572 |
| Inmt          | 0.0018 | -1.20 | 17467062 |
| Ehd2          | 0.0018 | -1.37 | 17486807 |
| 9230104L09Rik | 0.0018 | -0.71 | 17392600 |
| Plcb1         | 0.0018 | -1.03 | 17376685 |
| Tbc1d19       | 0.0018 | -0.61 | 17437505 |
| Arhgef25      | 0.0019 | -0.63 | 17245751 |
| Ephx3         | 0.0019 | -0.64 | 17343334 |
| Ppp1r14a      | 0.0019 | -1.19 | 17476119 |
| 5430417L22Rik | 0.0019 | -0.65 | 17374610 |
| Angpt1        | 0.0019 | -1.52 | 17316780 |
| Ace           | 0.0019 | -1.15 | 17257444 |
| Ica1          | 0.0019 | -0.76 | 17464803 |
| Pcolce2       | 0.0019 | -1.46 | 17520425 |
| Pcdh18        | 0.0019 | -1.49 | 17405075 |
| Parva         | 0.0019 | -1.10 | 17481916 |
| Adamts1       | 0.0019 | -1.55 | 17331705 |
| Tspan18       | 0.0019 | -1.01 | 17388435 |
| Grtp1         | 0.0020 | -1.08 | 17507559 |
| Syne1         | 0.0020 | -0.89 | 17238898 |
| Podxl         | 0.0020 | -1.39 | 17465620 |
| Cyp4b1        | 0.0020 | -1.29 | 17428477 |
| Smagp         | 0.0020 | -0.77 | 17321761 |
| Dlc1          | 0.0020 | -0.88 | 17508804 |
| Gm14322       | 0.0020 | -0.79 | 17380567 |
| Eng           | 0.0021 | -1.12 | 17369925 |
| Gpr126        | 0.0021 | -1.03 | 17239435 |

|               |        |       |          |
|---------------|--------|-------|----------|
| Nckap1        | 0.0021 | -0.85 | 17387316 |
| Dll1          | 0.0021 | -0.74 | 17341179 |
| Hecw2         | 0.0021 | -0.86 | 17223080 |
| Fam198b       | 0.0021 | -1.46 | 17398406 |
| Tie1          | 0.0021 | -1.22 | 17429206 |
| Bmp1          | 0.0021 | -0.76 | 17308361 |
| Cyrr1         | 0.0022 | -1.28 | 17331692 |
| Pcdh17        | 0.0022 | -1.26 | 17302289 |
| Rasgrp3       | 0.0022 | -0.94 | 17339772 |
| Chrm2         | 0.0022 | -0.82 | 17457310 |
| Edil3         | 0.0022 | -1.22 | 17288992 |
| Schip1        | 0.0022 | -0.69 | 17398198 |
| Trpc6         | 0.0022 | -1.33 | 17514623 |
| Caskin2       | 0.0022 | -0.85 | 17272019 |
| Ctnn          | 0.0022 | -0.89 | 17498398 |
| Robo1         | 0.0022 | -0.79 | 17326604 |
| Enpp2         | 0.0022 | -1.25 | 17317056 |
| Bmp6          | 0.0023 | -1.28 | 17286682 |
| Pvrl3         | 0.0023 | -0.97 | 17330773 |
| Stxbp1        | 0.0023 | -0.72 | 17384021 |
| Tspan9        | 0.0023 | -1.21 | 17471252 |
| Fbln5         | 0.0023 | -0.92 | 17283380 |
| Raver2        | 0.0023 | -0.61 | 17415897 |
| Wscd1         | 0.0023 | -0.77 | 17252292 |
| Lbp           | 0.0024 | -1.07 | 17378827 |
| Ppic          | 0.0024 | -1.01 | 17354378 |
| Cyp2d22       | 0.0024 | -0.86 | 17319625 |
| Mtap1b        | 0.0024 | -0.65 | 17295482 |
| Arhgap20      | 0.0024 | -1.01 | 17517222 |
| Gstm2         | 0.0025 | -1.24 | 17409142 |
| Pcp4l1        | 0.0025 | -1.16 | 17229639 |
| Egflam        | 0.0025 | -1.24 | 17315763 |
| 2810025M15Rik | 0.0025 | -0.94 | 17548987 |
| Rassf9        | 0.0025 | -1.24 | 17237028 |
| Vwf           | 0.0025 | -1.06 | 17463205 |
| Dkk3          | 0.0025 | -0.70 | 17495191 |
| 1810010H24Rik | 0.0026 | -1.27 | 17257642 |
| Klf4          | 0.0026 | -0.75 | 17425401 |
| Figf          | 0.0026 | -1.27 | 17539536 |
| Lama5         | 0.0026 | -0.76 | 17395512 |
| Upk1b         | 0.0026 | -1.26 | 17330427 |
| Hbegf         | 0.0026 | -0.79 | 17353699 |
| Mid2          | 0.0026 | -1.32 | 17538171 |
| Mxra8         | 0.0026 | -1.34 | 17422732 |
| Ppap2b        | 0.0026 | -1.42 | 17416234 |
| Fmo2          | 0.0026 | -1.30 | 17229036 |
| Syne1         | 0.0026 | -1.06 | 17238930 |
| Cadps2        | 0.0026 | -0.69 | 17465115 |
| Mxra8         | 0.0027 | -1.29 | 17433898 |

|          |        |       |          |
|----------|--------|-------|----------|
| Pls3     | 0.0027 | -0.93 | 17542853 |
| Glt25d2  | 0.0027 | -0.91 | 17218233 |
| Tenc1    | 0.0027 | -1.07 | 17315272 |
| Slc5a12  | 0.0027 | -1.46 | 17374137 |
| Nr2f2    | 0.0027 | -0.97 | 17492066 |
| St5      | 0.0028 | -1.08 | 17494894 |
| Cdh11    | 0.0028 | -1.34 | 17512153 |
| Klhl5    | 0.0028 | -0.78 | 17437704 |
| Lix1l    | 0.0028 | -1.01 | 17400622 |
| Stap2    | 0.0028 | -0.80 | 17346078 |
| Tbx2     | 0.0028 | -1.22 | 17254591 |
| Lmcd1    | 0.0028 | -0.95 | 17461477 |
| Syne1    | 0.0029 | -0.88 | 17238838 |
| Cyp2b10  | 0.0029 | -1.68 | 17475360 |
| Abca8a   | 0.0029 | -1.05 | 17271350 |
| Syne1    | 0.0029 | -0.79 | 17238850 |
| Serpinh1 | 0.0029 | -1.08 | 17493658 |
| Kitl     | 0.0030 | -1.20 | 17236900 |
| Zfp641   | 0.0030 | -0.87 | 17321202 |
| Plscr2   | 0.0030 | -1.00 | 17520326 |
| Pbx1     | 0.0030 | -0.94 | 17229417 |
| Chst15   | 0.0030 | -0.82 | 17497076 |
| Nicn1    | 0.0030 | -0.64 | 17521652 |
| Efemp1   | 0.0030 | -1.31 | 17247948 |
| Gm9917   | 0.0031 | -0.93 | 17530915 |
| Ddr2     | 0.0031 | -1.37 | 17229481 |
| Mpzl1    | 0.0031 | -1.02 | 17229259 |
| Tmod2    | 0.0031 | -0.92 | 17528863 |
| Ttll7    | 0.0031 | -0.96 | 17403571 |
| Dennd3   | 0.0032 | -0.67 | 17312097 |
| Slc16a9  | 0.0033 | -1.39 | 17234136 |
| Syne1    | 0.0033 | -0.61 | 17238896 |
| Mustn1   | 0.0033 | -0.88 | 17298262 |
| Laptm4b  | 0.0033 | -0.79 | 17310912 |
| Syne1    | 0.0033 | -1.12 | 17238926 |
| Bcl6b    | 0.0033 | -0.89 | 17265164 |
| Scn3a    | 0.0033 | -0.71 | 17385924 |
| Efna1    | 0.0033 | -1.25 | 17406990 |
| Cdc42bpa | 0.0033 | -1.11 | 17220059 |
| Aldh2    | 0.0034 | -0.95 | 17452231 |
| Sema3f   | 0.0034 | -1.11 | 17531001 |
| Ddah1    | 0.0034 | -1.40 | 17403439 |
| Cryab    | 0.0036 | -1.08 | 17517132 |
| Ctnnd1   | 0.0036 | -0.85 | 17387432 |
| Serping1 | 0.0037 | -1.43 | 17387517 |
| Bcar1    | 0.0038 | -0.99 | 17513158 |
| Stard8   | 0.0038 | -0.84 | 17536463 |
| Syde1    | 0.0038 | -1.22 | 17242535 |
| Syne1    | 0.0038 | -1.39 | 17238920 |

|               |        |       |          |
|---------------|--------|-------|----------|
| Nbea          | 0.0038 | -1.15 | 17405285 |
| Lhfp          | 0.0038 | -1.27 | 17397511 |
| Antxr1        | 0.0039 | -1.29 | 17468573 |
| LOC100861984  | 0.0040 | -0.74 | 17528772 |
| Meis1         | 0.0040 | -1.23 | 17260815 |
| Slc16a2       | 0.0040 | -0.74 | 17543817 |
| Fgd5          | 0.0040 | -0.98 | 17460994 |
| Hc            | 0.0040 | -0.96 | 17384374 |
| Maob          | 0.0040 | -0.95 | 17540378 |
| Glp1r         | 0.0040 | -1.16 | 17335726 |
| Ptprb         | 0.0041 | -1.18 | 17237451 |
| Arhgef12      | 0.0041 | -0.92 | 17526038 |
| Gsn           | 0.0041 | -0.94 | 17370209 |
| Rgs5          | 0.0041 | -1.04 | 17219139 |
| Scube1        | 0.0041 | -0.85 | 17319887 |
| Itga8         | 0.0041 | -1.36 | 17381717 |
| Nynrin        | 0.0042 | -0.66 | 17300686 |
| Gdpd1         | 0.0042 | -1.00 | 17267430 |
| Stom          | 0.0042 | -0.71 | 17384457 |
| Rtkn2         | 0.0042 | -0.61 | 17234008 |
| Tspan7        | 0.0042 | -1.11 | 17533269 |
| Npr2          | 0.0043 | -0.68 | 17413403 |
| 9530026P05Rik | 0.0043 | -0.63 | 17461060 |
| Nipa1         | 0.0043 | -0.70 | 17491454 |
| Cdh2          | 0.0043 | -0.74 | 17352884 |
| Fat1          | 0.0043 | -0.69 | 17500832 |
| Enpp5         | 0.0043 | -0.89 | 17337844 |
| S1pr3         | 0.0043 | -1.19 | 17287325 |
| Abi3bp        | 0.0044 | -1.28 | 17326318 |
| Pdia5         | 0.0044 | -0.77 | 17330058 |
| Ntn1          | 0.0044 | -0.81 | 17264405 |
| Nid1          | 0.0045 | -1.04 | 17285244 |
| Vcl           | 0.0046 | -0.85 | 17297551 |
| Lamb2         | 0.0046 | -1.08 | 17521727 |
| Dock9         | 0.0046 | -0.74 | 17309580 |
| Fgfr2         | 0.0046 | -1.09 | 17496947 |
| Tinagl1       | 0.0047 | -1.16 | 17430576 |
| A4galt        | 0.0047 | -0.89 | 17319801 |
| Maged1        | 0.0047 | -0.92 | 17543264 |
| Fads3         | 0.0047 | -0.75 | 17357444 |
| Efnb1         | 0.0047 | -1.02 | 17536483 |
| Itpripl2      | 0.0048 | -0.65 | 17495549 |
| Bmpr2         | 0.0048 | -1.04 | 17213336 |
| Acy3          | 0.0048 | -0.72 | 17356041 |
| Fam171a1      | 0.0048 | -1.18 | 17366359 |
| Slco2a1       | 0.0048 | -1.13 | 17520905 |
| Vsig2         | 0.0048 | -0.74 | 17516087 |
| Syne1         | 0.0048 | -0.82 | 17238844 |
| Rtp3          | 0.0048 | -0.93 | 17531693 |

|               |        |       |          |
|---------------|--------|-------|----------|
| Syne1         | 0.0049 | -0.76 | 17238928 |
| Ces2g         | 0.0049 | -1.40 | 17504572 |
| Slc35f5       | 0.0049 | -0.91 | 17216727 |
| Npnt          | 0.0049 | -1.28 | 17410435 |
| Lamb1         | 0.0050 | -1.12 | 17274775 |
| Tspan12       | 0.0050 | -1.09 | 17465044 |
| Jub           | 0.0050 | -0.83 | 17306396 |
| Ednra         | 0.0051 | -1.42 | 17510685 |
| Gab1          | 0.0051 | -0.87 | 17510823 |
| Fam164a       | 0.0052 | -0.63 | 17396009 |
| Cdk14         | 0.0053 | -0.90 | 17445329 |
| Snai2         | 0.0053 | -0.80 | 17323192 |
| 1300014I06Rik | 0.0053 | -0.78 | 17291803 |
| Krt80         | 0.0053 | -1.02 | 17321823 |
| Mill2         | 0.0053 | -0.66 | 17474363 |
| Nfib          | 0.0053 | -1.09 | 17426765 |
| Stard13       | 0.0054 | -0.91 | 17455578 |
| Oaz2          | 0.0054 | -0.61 | 17548287 |
| Sox7          | 0.0054 | -1.10 | 17301256 |
| Abcg2         | 0.0054 | -0.73 | 17459014 |
| Fbn1          | 0.0055 | -1.20 | 17390879 |
| Cyr61         | 0.0055 | -1.40 | 17410974 |
| Ctla2a        | 0.0055 | -0.96 | 17293362 |
| Lrp5          | 0.0056 | -0.78 | 17360977 |
| Xpnpep2       | 0.0056 | -0.98 | 17534528 |
| Tspan15       | 0.0056 | -0.76 | 17241308 |
| Neo1          | 0.0057 | -0.78 | 17527735 |
| Syne1         | 0.0057 | -0.98 | 17238918 |
| Ptpn14        | 0.0057 | -0.88 | 17220724 |
| Tns1          | 0.0057 | -0.92 | 17224211 |
| Myh10         | 0.0057 | -0.80 | 17251370 |
| Ltbp4         | 0.0057 | -1.24 | 17488179 |
| Rnf141        | 0.0058 | -0.70 | 17495088 |
| Pdgfrb        | 0.0058 | -1.41 | 17351027 |
| Mgp           | 0.0058 | -0.81 | 17472192 |
| Arhgap32      | 0.0059 | -0.69 | 17515786 |
| Zbtb46        | 0.0059 | -0.62 | 17395863 |
| Zcchc24       | 0.0059 | -0.74 | 17304147 |
| Gpr182        | 0.0059 | -1.16 | 17246038 |
| Mxra7         | 0.0059 | -1.04 | 17272509 |
| Jam2          | 0.0060 | -1.15 | 17326801 |
| Syne1         | 0.0061 | -0.79 | 17238904 |
| Ogn           | 0.0061 | -1.41 | 17287175 |
| Des           | 0.0061 | -0.93 | 17214476 |
| Cyb561        | 0.0061 | -0.71 | 17270703 |
| Sox17         | 0.0062 | -0.78 | 17221071 |
| Cd300lg       | 0.0062 | -0.88 | 17256870 |
| Apln          | 0.0062 | -1.47 | 17541378 |
| Crispld2      | 0.0063 | -0.97 | 17506206 |

|               |        |       |          |
|---------------|--------|-------|----------|
| Slc43a3       | 0.0063 | -0.84 | 17372644 |
| F3            | 0.0063 | -0.80 | 17402181 |
| Lyve1         | 0.0063 | -0.96 | 17495097 |
| Zdhhc1        | 0.0063 | -0.63 | 17512440 |
| Trim16        | 0.0064 | -0.78 | 17250775 |
| Kifc3         | 0.0064 | -0.69 | 17511927 |
| Mecom         | 0.0064 | -0.62 | 17404478 |
| Robo4         | 0.0064 | -1.07 | 17516047 |
| Ghr           | 0.0065 | -0.68 | 17315635 |
| Aqp11         | 0.0065 | -0.79 | 17493461 |
| Rnf144a       | 0.0065 | -0.68 | 17280315 |
| Reck          | 0.0065 | -0.94 | 17413474 |
| Adamts15      | 0.0065 | -0.62 | 17242879 |
| Mgst3         | 0.0065 | -0.63 | 17229403 |
| 1810029B16Rik | 0.0065 | -0.61 | 17509697 |
| Shroom4       | 0.0065 | -0.74 | 17532739 |
| Ushbp1        | 0.0065 | -0.94 | 17510295 |
| Lrp4          | 0.0065 | -1.21 | 17373283 |
| Mme           | 0.0066 | -1.40 | 17397990 |
| Csrp2         | 0.0066 | -0.73 | 17237208 |
| Cxcl12        | 0.0066 | -1.03 | 17462149 |
| Ptpru         | 0.0066 | -0.91 | 17430680 |
| Tmem47        | 0.0066 | -1.28 | 17536067 |
| Fam135a       | 0.0066 | -0.96 | 17221792 |
| Syne1         | 0.0067 | -0.82 | 17238834 |
| Dock6         | 0.0067 | -0.80 | 17524775 |
| Mcc           | 0.0067 | -0.94 | 17354189 |
| Slit2         | 0.0067 | -0.90 | 17437302 |
| Epas1         | 0.0068 | -0.89 | 17340197 |
| Tspan8        | 0.0069 | -1.14 | 17237412 |
| Gata2         | 0.0069 | -1.40 | 17460634 |
| A430105I19Rik | 0.0070 | -0.76 | 17389775 |
| Ece1          | 0.0070 | -0.85 | 17420347 |
| Sgip1         | 0.0071 | -0.83 | 17416061 |
| Sept10        | 0.0071 | -0.73 | 17240989 |
| Mllt4         | 0.0071 | -0.67 | 17333418 |
| 1110050K14Rik | 0.0071 | -0.93 | 17513550 |
| Flt1          | 0.0071 | -1.01 | 17455346 |
| App           | 0.0072 | -0.76 | 17331669 |
| Hes1          | 0.0072 | -0.98 | 17324623 |
| Fibin         | 0.0073 | -1.21 | 17389157 |
| Lrig3         | 0.0073 | -0.64 | 17237811 |
| Agap1         | 0.0073 | -0.76 | 17215576 |
| 1110017D15Rik | 0.0074 | -0.64 | 17424249 |
| Tspan2        | 0.0074 | -0.82 | 17401072 |
| Dock1         | 0.0074 | -0.77 | 17484167 |
| Bgn           | 0.0074 | -0.86 | 17542364 |
| Cd209d        | 0.0076 | -0.66 | 17507184 |
| Dpysl3        | 0.0076 | -0.61 | 17354101 |

|         |        |       |          |
|---------|--------|-------|----------|
| Glb1l3  | 0.0077 | -0.67 | 17525118 |
| Lox     | 0.0077 | -0.89 | 17354367 |
| Btbd3   | 0.0078 | -0.60 | 17376867 |
| Ptgfrn  | 0.0078 | -1.05 | 17408483 |
| Prkaa2  | 0.0078 | -0.91 | 17427746 |
| Ifitm3  | 0.0078 | -0.75 | 17497718 |
| Dtna    | 0.0079 | -0.64 | 17348902 |
| Nox4    | 0.0079 | -1.08 | 17479974 |
| Scnn1a  | 0.0079 | -0.89 | 17463169 |
| Fgfr3   | 0.0079 | -1.12 | 17436481 |
| Sdc2    | 0.0080 | -1.06 | 17310872 |
| Myh11   | 0.0080 | -0.67 | 17328368 |
| Ctgf    | 0.0080 | -1.05 | 17232235 |
| Vangl1  | 0.0081 | -0.84 | 17408563 |
| Rassf8  | 0.0081 | -0.76 | 17464271 |
| Slitrk6 | 0.0081 | -0.90 | 17309368 |
| Zfp366  | 0.0081 | -0.90 | 17289432 |
| Apbb2   | 0.0082 | -0.72 | 17448415 |
| C7      | 0.0082 | -1.36 | 17315686 |
| Pkd2    | 0.0082 | -0.87 | 17439842 |
| Pdgfra  | 0.0082 | -1.39 | 17438246 |
| Syne1   | 0.0082 | -0.85 | 17238876 |
| Rapgef3 | 0.0082 | -0.72 | 17321007 |
| Stx3    | 0.0082 | -0.77 | 17363025 |
| Cd151   | 0.0083 | -0.84 | 17484940 |
| Abca8b  | 0.0084 | -0.93 | 17271307 |
| Itga1   | 0.0084 | -0.94 | 17296388 |
| Nrxn2   | 0.0085 | -0.78 | 17362028 |
| Amph    | 0.0085 | -0.87 | 17285488 |
| Cebpd   | 0.0085 | -0.83 | 17323297 |
| Arl4d   | 0.0085 | -0.89 | 17256823 |
| Sema7a  | 0.0086 | -0.92 | 17517812 |
| Arhgap6 | 0.0086 | -0.67 | 17539658 |
| Gja4    | 0.0086 | -0.72 | 17430211 |
| Zbtb10  | 0.0087 | -0.61 | 17396035 |
| Cxcl15  | 0.0087 | -1.44 | 17438980 |
| Hunk    | 0.0087 | -0.70 | 17326964 |
| Vtn     | 0.0087 | -1.06 | 17253656 |
| Pla2r1  | 0.0088 | -0.76 | 17385614 |
| Syne1   | 0.0090 | -0.75 | 17238888 |
| Fam13a  | 0.0091 | -0.68 | 17467209 |
| Hspb8   | 0.0091 | -0.87 | 17451816 |
| Arap3   | 0.0091 | -0.91 | 17353881 |
| Ntrk2   | 0.0091 | -0.65 | 17287901 |
| Gnao1   | 0.0092 | -0.95 | 17503884 |
| Plac9   | 0.0094 | -0.85 | 17304186 |
| Aff2    | 0.0094 | -0.81 | 17535245 |
| Gng11   | 0.0094 | -1.02 | 17455793 |
| Pdzd2   | 0.0094 | -1.21 | 17316068 |

|               |        |       |          |
|---------------|--------|-------|----------|
| Epha4         | 0.0095 | -0.88 | 17224661 |
| Syne1         | 0.0095 | -0.70 | 17238890 |
| Zfp503        | 0.0096 | -0.68 | 17303989 |
| Tmem200b      | 0.0096 | -0.74 | 17419369 |
| D030029J20Rik | 0.0097 | -0.88 | 17387430 |
| Pgm5          | 0.0097 | -0.97 | 17363626 |
| Samd5         | 0.0098 | -1.12 | 17239142 |
| Olfml2a       | 0.0099 | -0.93 | 17370487 |
| Bmpr2         | 0.0099 | -0.75 | 17213321 |
| Shroom3       | 0.0099 | -0.76 | 17439138 |
| Syne1         | 0.0099 | -0.63 | 17238842 |
| Tbx5          | 0.0101 | -1.20 | 17441610 |
| Pcdhb22       | 0.0101 | -0.61 | 17349949 |
| Tox3          | 0.0102 | -0.82 | 17511550 |
| Syne1         | 0.0102 | -0.84 | 17238880 |
| Lmo7          | 0.0102 | -1.09 | 17302429 |
| Scamp1        | 0.0102 | -0.70 | 17295038 |
| Fhl1          | 0.0103 | -0.92 | 17534960 |
| Fmnl2         | 0.0103 | -0.65 | 17370807 |
| Gpr124        | 0.0103 | -0.71 | 17500301 |
| Fads2         | 0.0104 | -0.68 | 17362595 |
| Parvb         | 0.0106 | -0.89 | 17313705 |
| Nova1         | 0.0106 | -0.78 | 17280913 |
| Fat4          | 0.0107 | -0.96 | 17397185 |
| B3gnt3        | 0.0107 | -0.67 | 17510422 |
| Lrat          | 0.0107 | -1.31 | 17406247 |
| Plac9         | 0.0108 | -0.86 | 17304155 |
| Plac9         | 0.0108 | -0.86 | 17304170 |
| Nkd1          | 0.0109 | -1.12 | 17503650 |
| Syne1         | 0.0109 | -1.04 | 17238830 |
| Bgn           | 0.0109 | -0.91 | 17535558 |
| Epb4.1l4a     | 0.0109 | -0.81 | 17353378 |
| Gm4956        | 0.0110 | -0.89 | 17221676 |
| Dysf          | 0.0110 | -0.60 | 17460185 |
| Pdgfb         | 0.0110 | -0.75 | 17319380 |
| Timp3         | 0.0111 | -1.08 | 17236182 |
| Mylk          | 0.0111 | -0.98 | 17325159 |
| Akap5         | 0.0111 | -0.61 | 17276552 |
| Dpep1         | 0.0111 | -1.23 | 17506532 |
| Rcn3          | 0.0112 | -0.70 | 17490578 |
| Prickle2      | 0.0112 | -1.09 | 17469121 |
| Flt4          | 0.0113 | -0.84 | 17248992 |
| Kcnq1         | 0.0113 | -0.87 | 17485320 |
| F11r          | 0.0114 | -0.90 | 17219362 |
| Me1           | 0.0114 | -0.62 | 17529398 |
| Car4          | 0.0114 | -0.90 | 17254508 |
| Psd3          | 0.0115 | -0.66 | 17509723 |
| Clstn1        | 0.0115 | -0.67 | 17421828 |
| Nid1          | 0.0115 | -1.05 | 17285225 |



|               |        |       |          |
|---------------|--------|-------|----------|
| Akap2         | 0.0116 | -0.82 | 17414364 |
| Pkia          | 0.0117 | -0.68 | 17396003 |
| Syne1         | 0.0117 | -0.82 | 17238854 |
| Cyp1a1        | 0.0119 | -0.67 | 17517770 |
| Zfyve9        | 0.0119 | -0.65 | 17428094 |
| Ltbp2         | 0.0119 | -0.94 | 17282570 |
| Meis2         | 0.0120 | -1.02 | 17389608 |
| Vgll3         | 0.0120 | -0.85 | 17326541 |
| Mamdc2        | 0.0120 | -1.17 | 17363533 |
| Ecm2          | 0.0120 | -1.26 | 17287148 |
| Ier3          | 0.0120 | -0.92 | 17337228 |
| Mfge8         | 0.0121 | -0.86 | 17492314 |
| Gprc5a        | 0.0122 | -0.87 | 17463747 |
| Tmem44        | 0.0123 | -1.11 | 17329675 |
| Rab34         | 0.0123 | -0.70 | 17253478 |
| Tle1          | 0.0124 | -0.63 | 17426517 |
| C1qtnf2       | 0.0124 | -0.72 | 17248613 |
| Plekhg1       | 0.0125 | -0.79 | 17231366 |
| Cgrrf1        | 0.0125 | -0.63 | 17299279 |
| Sema6a        | 0.0127 | -1.14 | 17354299 |
| Pawr          | 0.0128 | -0.61 | 17237170 |
| Tril          | 0.0128 | -0.64 | 17466932 |
| Vsnl1         | 0.0129 | -1.32 | 17279980 |
| Plscr4        | 0.0129 | -0.93 | 17520353 |
| Tnfrsf19      | 0.0129 | -0.79 | 17307433 |
| Hyal1         | 0.0130 | -1.22 | 17521428 |
| Dusp3         | 0.0131 | -0.65 | 17269985 |
| Ptk7          | 0.0131 | -0.64 | 17345475 |
| Gnai1         | 0.0131 | -0.90 | 17445735 |
| Dock4         | 0.0132 | -0.65 | 17275168 |
| Samd12        | 0.0133 | -0.85 | 17317031 |
| Slit3         | 0.0135 | -0.89 | 17248426 |
| Scube2        | 0.0136 | -1.17 | 17494950 |
| Hgf           | 0.0136 | -0.88 | 17434933 |
| BC020535      | 0.0137 | -0.92 | 17377857 |
| Tcn2          | 0.0137 | -0.63 | 17259907 |
| Syne1         | 0.0139 | -0.67 | 17238900 |
| Syne1         | 0.0139 | -0.67 | 17238848 |
| Pir           | 0.0142 | -0.62 | 17539519 |
| Ror1          | 0.0143 | -0.72 | 17415835 |
| Fzd8          | 0.0145 | -0.68 | 17348276 |
| Sema3b        | 0.0147 | -0.68 | 17530930 |
| A430107O13Rik | 0.0147 | -0.84 | 17456339 |
| 3110070M22Rik | 0.0150 | -0.61 | 17290155 |
| Syne1         | 0.0151 | -0.82 | 17238868 |
| Spon1         | 0.0152 | -1.19 | 17482000 |
| Pmp22         | 0.0152 | -0.66 | 17250839 |
| Pygm          | 0.0156 | -0.63 | 17356874 |
| Chn1          | 0.0157 | -0.62 | 17386569 |

|               |        |       |          |
|---------------|--------|-------|----------|
| Slc22a23      | 0.0157 | -0.94 | 17291787 |
| Fkbp7         | 0.0158 | -0.81 | 17386770 |
| Pard3         | 0.0158 | -0.71 | 17506949 |
| Ttc12         | 0.0159 | -0.65 | 17526753 |
| Pltp          | 0.0160 | -0.69 | 17394297 |
| Plscr3        | 0.0160 | -0.62 | 17251756 |
| Ehd4          | 0.0162 | -0.73 | 17390066 |
| Syne1         | 0.0163 | -0.89 | 17238870 |
| Fxyd1         | 0.0163 | -0.74 | 17489420 |
| Tlr3          | 0.0163 | -0.89 | 17509101 |
| Rras          | 0.0164 | -0.66 | 17477670 |
| Heyl          | 0.0164 | -0.60 | 17418177 |
| Cdc42bpb      | 0.0166 | -0.67 | 17284065 |
| Nes           | 0.0167 | -0.89 | 17398903 |
| Dpt           | 0.0167 | -1.32 | 17218927 |
| Slc34a2       | 0.0168 | -1.48 | 17437459 |
| Osmr          | 0.0170 | -1.17 | 17315743 |
| Lphn3         | 0.0172 | -1.07 | 17438530 |
| Mtss1l        | 0.0172 | -0.73 | 17505623 |
| Gata6         | 0.0174 | -0.66 | 17348400 |
| Slc10a6       | 0.0174 | -0.66 | 17450319 |
| Lepr          | 0.0176 | -1.02 | 17415979 |
| Glb1l2        | 0.0176 | -1.14 | 17525090 |
| E130203B14Rik | 0.0178 | -0.73 | 17298631 |
| Angpt2        | 0.0180 | -0.97 | 17507799 |
| Zbtb16        | 0.0181 | -0.62 | 17526707 |
| Sema4c        | 0.0181 | -0.66 | 17222211 |
| Fgfr4         | 0.0181 | -0.77 | 17287590 |
| Ces2c         | 0.0181 | -0.72 | 17504512 |
| Boc           | 0.0182 | -0.75 | 17330577 |
| Fam189a2      | 0.0187 | -0.84 | 17363559 |
| Gfra2         | 0.0190 | -0.81 | 17301823 |
| Ceacam1       | 0.0191 | -0.92 | 17487952 |
| Sult1a1       | 0.0192 | -0.65 | 17496354 |
| Gulp1         | 0.0192 | -0.74 | 17212442 |
| Casp12        | 0.0193 | -0.74 | 17514447 |
| Slc1a1        | 0.0193 | -0.72 | 17358466 |
| Scnn1g        | 0.0194 | -0.84 | 17482681 |
| Klf9          | 0.0195 | -0.72 | 17358214 |
| Sorbs3        | 0.0197 | -0.64 | 17308257 |
| Vldlr         | 0.0198 | -0.67 | 17358422 |
| Robo2         | 0.0198 | -0.73 | 17331481 |
| Glis2         | 0.0201 | -0.64 | 17322525 |
| Clec4g        | 0.0202 | -0.83 | 17507148 |
| Slc40a1       | 0.0202 | -0.81 | 17222777 |
| Sftpb         | 0.0203 | -1.03 | 17459601 |
| Plekhh2       | 0.0203 | -0.81 | 17340050 |
| Plxdc2        | 0.0204 | -0.77 | 17367216 |
| Plod2         | 0.0204 | -0.60 | 17520364 |

|               |        |       |          |
|---------------|--------|-------|----------|
| Kcnk3         | 0.0204 | -0.60 | 17435811 |
| Pde7b         | 0.0205 | -0.67 | 17239638 |
| Gm13889       | 0.0205 | -0.96 | 17388548 |
| Cdr2l         | 0.0205 | -0.65 | 17258178 |
| Arhgef17      | 0.0207 | -0.86 | 17493842 |
| Pros1         | 0.0208 | -0.63 | 17326510 |
| Plxna2        | 0.0209 | -0.89 | 17220974 |
| Jag1          | 0.0210 | -0.65 | 17392151 |
| Syne1         | 0.0210 | -0.79 | 17238858 |
| Cbfa2t3       | 0.0213 | -0.62 | 17513806 |
| B230120H23Rik | 0.0213 | -0.81 | 17371912 |
| Arhgef26      | 0.0216 | -0.96 | 17397968 |
| Atp1a2        | 0.0220 | -1.15 | 17229891 |
| Ramp2         | 0.0220 | -0.81 | 17256607 |
| Lrrc16a       | 0.0222 | -0.71 | 17291275 |
| Fstl1         | 0.0223 | -0.83 | 17325514 |
| Cyp2f2        | 0.0223 | -1.22 | 17475498 |
| Cttnbp2nl     | 0.0227 | -0.62 | 17408813 |
| Mansc1        | 0.0228 | -0.64 | 17472023 |
| Syne1         | 0.0228 | -0.92 | 17238840 |
| Cacna1c       | 0.0231 | -0.85 | 17470235 |
| Lysmd2        | 0.0232 | -0.61 | 17519533 |
| Kank2         | 0.0233 | -0.63 | 17524760 |
| Syne1         | 0.0239 | -0.75 | 17238878 |
| Prelp         | 0.0239 | -1.09 | 17227077 |
| Hist1h2bc     | 0.0240 | -0.66 | 17285851 |
| C1qtnf7       | 0.0241 | -0.80 | 17437148 |
| Cd24a         | 0.0241 | -0.77 | 17233022 |
| Svep1         | 0.0246 | -0.92 | 17425631 |
| Ablim3        | 0.0246 | -0.78 | 17354831 |
| Rin2          | 0.0247 | -0.70 | 17377177 |
| Scnn1b        | 0.0249 | -0.66 | 17482699 |
| Syne1         | 0.0251 | -0.70 | 17238862 |
| Hbb-b1        | 0.0251 | -1.44 | 17494221 |
| Sftpc         | 0.0252 | -1.35 | 17308388 |
| Fkbp10        | 0.0255 | -0.78 | 17256365 |
| Cadm1         | 0.0256 | -0.66 | 17516960 |
| Syne1         | 0.0257 | -0.83 | 17238846 |
| Gabra3        | 0.0258 | -0.63 | 17542220 |
| Chst1         | 0.0259 | -0.98 | 17373521 |
| Yes1          | 0.0261 | -0.90 | 17436328 |
| Tekt5         | 0.0272 | -0.72 | 17328070 |
| Syne1         | 0.0273 | -0.62 | 17238860 |
| Mmp2          | 0.0283 | -0.99 | 17503825 |
| Syne1         | 0.0283 | -0.62 | 17238874 |
| Etv1          | 0.0292 | -0.81 | 17289547 |
| Ctdspl        | 0.0293 | -0.72 | 17522958 |
| Syne1         | 0.0295 | -0.63 | 17238872 |
| Nt5dc2        | 0.0298 | -0.70 | 17298364 |

|               |        |       |          |
|---------------|--------|-------|----------|
| Syne1         | 0.0298 | -0.83 | 17238924 |
| Pcdhb17       | 0.0304 | -0.88 | 17349926 |
| Syne1         | 0.0304 | -0.92 | 17238866 |
| Faim2         | 0.0311 | -0.67 | 17321582 |
| Rnf144b       | 0.0315 | -0.72 | 17287066 |
| Syne1         | 0.0317 | -0.84 | 17238852 |
| Clu           | 0.0317 | -0.86 | 17301452 |
| 2610034B18Rik | 0.0324 | -0.72 | 17492466 |
| Rtn2          | 0.0324 | -0.65 | 17474547 |
| Tcf7l1        | 0.0324 | -0.73 | 17467806 |
| Tgfb1i1       | 0.0326 | -0.80 | 17483696 |
| Chrdl1        | 0.0328 | -0.70 | 17545087 |
| Tbx4          | 0.0328 | -0.67 | 17254602 |
| Arhgap23      | 0.0334 | -0.63 | 17255788 |
| Sash1         | 0.0341 | -0.71 | 17239113 |
| Serpina3n     | 0.0343 | -1.01 | 17278328 |
| Tmem98        | 0.0347 | -0.65 | 17253996 |
| Cox4i2        | 0.0347 | -0.76 | 17377785 |
| Gprc6a        | 0.0347 | -0.97 | 17240737 |
| Cd209a        | 0.0348 | -0.68 | 17507161 |
| Fut10         | 0.0348 | -0.74 | 17500412 |
| Sftpa1        | 0.0349 | -1.05 | 17298968 |
| Trpc1         | 0.0350 | -0.61 | 17529748 |
| Sox11         | 0.0351 | -0.63 | 17280350 |
| Gnaq          | 0.0353 | -0.61 | 17357959 |
| Pgm5          | 0.0353 | -0.88 | 17358266 |
| Tshz3         | 0.0364 | -0.63 | 17476866 |
| Nbl1          | 0.0365 | -0.72 | 17431861 |
| Gucy1a2       | 0.0368 | -0.80 | 17514399 |
| Col1a1        | 0.0381 | -0.70 | 17255260 |
| Mrc2          | 0.0386 | -0.67 | 17257361 |
| Syne1         | 0.0389 | -0.65 | 17238828 |
| Epha2         | 0.0396 | -0.67 | 17421033 |
| Gpx3          | 0.0402 | -0.92 | 17249787 |
| Gabarapl1     | 0.0403 | -0.62 | 17463550 |
| Spry4         | 0.0404 | -0.78 | 17353957 |
| Cd24a         | 0.0406 | -0.71 | 17240606 |
| Frmd4a        | 0.0409 | -0.62 | 17366451 |
| Ms4a4d        | 0.0415 | -0.72 | 17357700 |
| Chi3l1        | 0.0420 | -0.72 | 17217399 |
| Sema5a        | 0.0421 | -0.79 | 17310837 |
| Bmp3          | 0.0426 | -0.75 | 17439535 |
| D530008I23    | 0.0427 | -0.67 | 17382378 |
| D14Ertd668e   | 0.0428 | -0.60 | 17307290 |
| Adm           | 0.0435 | -0.65 | 17481770 |
| Gstm1         | 0.0439 | -0.68 | 17409154 |
| Gp9           | 0.0447 | -0.68 | 17460569 |
| Syne1         | 0.0448 | -0.93 | 17238832 |
| Mmrn1         | 0.0451 | -0.61 | 17459097 |

|               |        |       |          |
|---------------|--------|-------|----------|
| Scarf1        | 0.0452 | -0.66 | 17252980 |
| Cyp26b1       | 0.0453 | -0.66 | 17468286 |
| Prx           | 0.0461 | -0.63 | 17475603 |
| Loxl1         | 0.0462 | -0.84 | 17527694 |
| Fam149a       | 0.0465 | -0.67 | 17509083 |
| Hspb1         | 0.0466 | -0.67 | 17443342 |
| Tecrl         | 0.0467 | -0.61 | 17449108 |
| 8430408G22Rik | 0.0469 | -0.61 | 17462145 |
| Syne1         | 0.0476 | -0.87 | 17238856 |
| Col1a2        | 0.0479 | -0.62 | 17455801 |
| Mras          | 0.0480 | -0.60 | 17530059 |
| Rcan1         | 0.0480 | -0.64 | 17332228 |
| Tmem22        | 0.0486 | -0.83 | 17530137 |
| Sntn          | 0.0491 | -0.60 | 17297181 |
| Sod3          | 0.0493 | -0.73 | 17437385 |

## Appendix 2. Genes that were differentially expressed in macrophages.

| Gene_Symbol         | P value | FC (log2) | Transcript_Cluster_ID |
|---------------------|---------|-----------|-----------------------|
| <b>Up-regulated</b> |         |           |                       |
| Fhdc1               | 0.0000  | 0.77      | 17406363              |
| Aldh8a1             | 0.0000  | 0.62      | 17232025              |
| Tgfb3               | 0.0001  | 0.60      | 17282743              |
| Il2rb               | 0.0003  | 1.04      | 17319009              |
| Scgb1a1             | 0.0004  | 2.36      | 17362539              |
| Xirp2               | 0.0008  | 0.60      | 17371296              |
| Ccl8                | 0.0008  | 1.98      | 17254065              |
| Dusp5               | 0.0009  | 0.74      | 17360348              |
| Tas2r109            | 0.0010  | 0.82      | 17471966              |
| Slc38a2             | 0.0011  | 0.82      | 17320928              |
| Prg2                | 0.0017  | 0.99      | 17372662              |
| Tuba1a              | 0.0018  | 1.24      | 17321474              |
| C1qc                | 0.0021  | 0.80      | 17431612              |
| Gm11978             | 0.0024  | 0.62      | 17260453              |
| 2010010A            | 0.0030  | 1.04      | 17355455              |
| Gm13286             | 0.0039  | 1.01      | 17415345              |
| Pygm                | 0.0040  | 0.97      | 17356874              |
| 1810035I            | 0.0040  | 0.71      | 17421138              |
| 5430421F            | 0.0043  | 0.83      | 17508369              |
| Rnf125              | 0.0043  | 0.93      | 17348840              |
| Cd38                | 0.0046  | 0.89      | 17437213              |
| 3110070M            | 0.0047  | -0.60     | 17290155              |
| Khdc1a              | 0.0048  | 0.96      | 17211416              |
| Zfp651              | 0.0049  | 0.64      | 17523352              |
| Ms4a4c              | 0.0051  | 1.38      | 17357648              |
| A530021J            | 0.0051  | 0.68      | 17479841              |
| Fgl2                | 0.0052  | 0.84      | 17435089              |
| Arhgap27            | 0.0052  | 0.62      | 17270481              |
| Folr1               | 0.0053  | 0.61      | 17493956              |
| Gpr183              | 0.0055  | 1.55      | 17309649              |
| Gm19877             | 0.0056  | 0.63      | 17222524              |
| Cd97                | 0.0057  | 2.81      | 17510948              |
| Lrig1               | 0.0067  | 1.26      | 17469217              |
| Prl8a6              | 0.0067  | 0.68      | 17291420              |
| Adam19              | 0.0067  | 0.75      | 17248754              |
| Trim25              | 0.0077  | 0.68      | 17255026              |
| Cpm                 | 0.0078  | 0.84      | 17237547              |
| 1700056N            | 0.0083  | 0.68      | 17323387              |
| Gpr97               | 0.0085  | 0.65      | 17504207              |
| BE949265            | 0.0091  | 0.72      | 17337963              |
| Gm20264             | 0.0091  | 0.81      | 17545477              |
| Zfp36l1             | 0.0095  | 1.84      | 17282216              |
| Cd86                | 0.0095  | 0.74      | 17330203              |

|          |        |      |          |
|----------|--------|------|----------|
| Amica1   | 0.0095 | 0.67 | 17516718 |
| Sema4c   | 0.0096 | 0.65 | 17222211 |
| Gatm     | 0.0097 | 0.68 | 17390810 |
| Whsc111  | 0.0103 | 0.61 | 17500135 |
| LOC10050 | 0.0105 | 1.16 | 17547911 |
| Il10     | 0.0105 | 1.69 | 17216990 |
| Fam102a  | 0.0108 | 0.75 | 17369841 |
| Wfikkn1  | 0.0111 | 1.01 | 17342491 |
| Auts2    | 0.0112 | 0.67 | 17453242 |
| Snora30  | 0.0112 | 0.98 | 17483383 |
| Emp1     | 0.0114 | 1.10 | 17548559 |
| Olfr48   | 0.0114 | 0.62 | 17388006 |
| Csrnp1   | 0.0119 | 0.84 | 17532257 |
| Olfr1230 | 0.0121 | 0.90 | 17387926 |
| Hivep1   | 0.0122 | 0.74 | 17286818 |
| Olfr177  | 0.0127 | 0.88 | 17547980 |
| Ngp      | 0.0129 | 0.60 | 17522369 |
| Rbm38    | 0.0131 | 0.85 | 17395057 |
| Mir694   | 0.0133 | 0.65 | 17355131 |
| LOC66550 | 0.0134 | 1.65 | 17457804 |
| Slamf8   | 0.0134 | 0.67 | 17229931 |
| Inpp5k   | 0.0134 | 0.63 | 17253037 |
| Grap2    | 0.0134 | 1.41 | 17313147 |
| Bpifb9a  | 0.0137 | 0.89 | 17378184 |
| Sfn      | 0.0138 | 0.77 | 17431049 |
| Stx3     | 0.0139 | 0.61 | 17363025 |
| A330094K | 0.0140 | 0.60 | 17355535 |
| Alas2    | 0.0144 | 1.34 | 17538575 |
| Irs2     | 0.0147 | 0.67 | 17507374 |
| Ccr7     | 0.0147 | 1.29 | 17268972 |
| LOC10086 | 0.0148 | 1.47 | 17548315 |
| Ccr5     | 0.0152 | 1.39 | 17523659 |
| LOC67005 | 0.0159 | 0.79 | 17422940 |
| Eif2s2   | 0.0160 | 1.60 | 17393192 |
| LOC10086 | 0.0160 | 1.32 | 17547986 |
| Gm7168   | 0.0164 | 0.61 | 17333461 |
| Gm19261  | 0.0164 | 0.64 | 17362970 |
| Vmn1r58  | 0.0165 | 0.77 | 17486039 |
| C1qb     | 0.0166 | 0.89 | 17431607 |
| Fam83g   | 0.0173 | 0.62 | 17250624 |
| Defb2    | 0.0175 | 0.86 | 17499818 |
| Ms4a6b   | 0.0176 | 1.39 | 17357688 |
| Gm8989   | 0.0177 | 0.64 | 17494651 |
| 1110059G | 0.0181 | 0.64 | 17532455 |
| Ippk     | 0.0183 | 0.78 | 17287126 |
| Asb1     | 0.0186 | 0.83 | 17215788 |
| Riiad1   | 0.0188 | 0.84 | 17407550 |
| Gm17749  | 0.0189 | 1.41 | 17528271 |
| 4932416K | 0.0194 | 0.64 | 17504493 |

|          |        |      |          |
|----------|--------|------|----------|
| Mtmr1    | 0.0196 | 0.60 | 17535319 |
| Glcci1   | 0.0196 | 0.63 | 17456001 |
| Olfr494  | 0.0201 | 0.63 | 17481614 |
| Arid4a   | 0.0201 | 0.67 | 17276070 |
| Serpib8  | 0.0201 | 0.86 | 17216478 |
| Edn1     | 0.0203 | 0.68 | 17286830 |
| C1qa     | 0.0204 | 0.86 | 17431619 |
| Gm5547   | 0.0207 | 1.03 | 17401414 |
| Rassf2   | 0.0207 | 0.71 | 17391920 |
| 2610005L | 0.0207 | 1.06 | 17507872 |
| Coil     | 0.0210 | 0.76 | 17267626 |
| Snord13  | 0.0211 | 1.14 | 17508591 |
| Rab3il1  | 0.0212 | 0.72 | 17357425 |
| Mfsd6l   | 0.0219 | 0.82 | 17251354 |
| Dennd4a  | 0.0221 | 0.67 | 17518378 |
| Olfr582  | 0.0221 | 1.19 | 17481167 |
| Tmem39a  | 0.0222 | 0.61 | 17325619 |
| Klrd1    | 0.0226 | 1.58 | 17463567 |
| Snora5c  | 0.0230 | 1.14 | 17260440 |
| Arl15    | 0.0233 | 0.72 | 17290033 |
| Agr2     | 0.0234 | 0.67 | 17275015 |
| Ttc28    | 0.0238 | 0.81 | 17440592 |
| Apold1   | 0.0250 | 0.92 | 17463727 |
| Mir532   | 0.0250 | 1.89 | 17539826 |
| Fn3k     | 0.0259 | 0.68 | 17259623 |
| Olfr310  | 0.0261 | 0.71 | 17493116 |
| 1700030N | 0.0262 | 1.06 | 17360916 |
| 1700012A | 0.0264 | 0.64 | 17218290 |
| Zscan30  | 0.0267 | 0.63 | 17353108 |
| LOC10086 | 0.0267 | 1.51 | 17548166 |
| 2810422O | 0.0269 | 0.62 | 17218813 |
| Apoe     | 0.0270 | 0.83 | 17487381 |
| Pif1     | 0.0271 | 0.64 | 17518596 |
| LOC10004 | 0.0274 | 0.73 | 17532655 |
| Cxcr4    | 0.0275 | 0.73 | 17226593 |
| Ttc18    | 0.0279 | 0.66 | 17303769 |
| Sik3     | 0.0279 | 0.67 | 17516871 |
| H2-Q6    | 0.0282 | 0.78 | 17337122 |
| Casp8ap2 | 0.0283 | 0.76 | 17412404 |
| Tnfrsf17 | 0.0285 | 0.98 | 17322944 |
| LOC43441 | 0.0285 | 0.70 | 17528537 |
| Mir1957  | 0.0293 | 0.99 | 17417858 |
| Gtf2h2   | 0.0295 | 1.03 | 17295646 |
| Fbln7    | 0.0295 | 0.72 | 17376051 |
| Plbd1    | 0.0297 | 1.61 | 17472114 |
| Nt5c3    | 0.0297 | 0.82 | 17467128 |
| Olfr1506 | 0.0298 | 0.74 | 17372974 |
| Olfr1506 | 0.0298 | 0.74 | 17388030 |
| Olfr1444 | 0.0298 | 0.76 | 17357887 |



|          |        |      |          |
|----------|--------|------|----------|
| AW121686 | 0.0300 | 0.72 | 17313616 |
| Snora20  | 0.0301 | 1.78 | 17333344 |
| Gm15472  | 0.0304 | 0.62 | 17401293 |
| Il7r     | 0.0304 | 2.51 | 17315891 |
| Atf2     | 0.0304 | 0.68 | 17386591 |
| 6720401G | 0.0309 | 0.63 | 17541567 |
| Nckap5   | 0.0315 | 0.63 | 17226447 |
| Apoc2    | 0.0316 | 0.76 | 17487361 |
| Hba-a2   | 0.0320 | 0.69 | 17248263 |
| Mx2      | 0.0329 | 0.64 | 17327557 |
| Gm9840   | 0.0334 | 0.72 | 17344508 |
| Il21r    | 0.0336 | 0.82 | 17482958 |
| Gm13710  | 0.0337 | 0.66 | 17387426 |
| LOC10086 | 0.0338 | 2.11 | 17547656 |
| Mir7-1   | 0.0340 | 1.23 | 17293163 |
| Crisp1   | 0.0345 | 0.83 | 17344953 |
| Snord116 | 0.0348 | 0.71 | 17491537 |
| Snord116 | 0.0348 | 0.71 | 17491539 |
| Snord116 | 0.0348 | 0.71 | 17491566 |
| Snord116 | 0.0348 | 0.71 | 17491570 |
| Snord116 | 0.0348 | 0.71 | 17491572 |
| Snord116 | 0.0348 | 0.71 | 17491574 |
| Snord116 | 0.0348 | 0.71 | 17491576 |
| Snord116 | 0.0348 | 0.71 | 17491578 |
| Snord116 | 0.0348 | 0.71 | 17491580 |
| Snord116 | 0.0348 | 0.71 | 17491582 |
| Snord116 | 0.0348 | 0.71 | 17491584 |
| Snord116 | 0.0348 | 0.71 | 17491586 |
| Snord116 | 0.0348 | 0.71 | 17491588 |
| Snord116 | 0.0348 | 0.71 | 17491590 |
| Snord116 | 0.0348 | 0.71 | 17491592 |
| Snord116 | 0.0348 | 0.71 | 17491594 |
| F2r      | 0.0356 | 0.86 | 17295130 |
| Extl2    | 0.0356 | 0.80 | 17402001 |
| Scara5   | 0.0358 | 0.75 | 17301414 |
| Cpne2    | 0.0359 | 0.95 | 17504074 |
| Ms4a1    | 0.0359 | 1.01 | 17362922 |
| Dpp4     | 0.0359 | 0.63 | 17385719 |
| 4921523A | 0.0366 | 0.62 | 17345971 |
| Olfr668  | 0.0370 | 0.80 | 17494447 |
| Fam102b  | 0.0370 | 0.89 | 17409463 |
| Slc7a5   | 0.0378 | 1.83 | 17513641 |
| Gdf3     | 0.0380 | 0.73 | 17470592 |
| Ankrd12  | 0.0384 | 0.83 | 17346781 |
| Siah1b   | 0.0385 | 0.66 | 17545947 |
| Adig     | 0.0392 | 0.64 | 17378898 |
| Nr1d1    | 0.0399 | 0.89 | 17268884 |
| Spred3   | 0.0410 | 0.75 | 17488735 |
| Cyp2b10  | 0.0411 | 0.75 | 17475360 |

|          |        |      |          |
|----------|--------|------|----------|
| Mir18    | 0.0415 | 1.59 | 17302634 |
| Slc29a3  | 0.0415 | 0.63 | 17548262 |
| Ly86     | 0.0416 | 1.47 | 17286587 |
| Olfr116  | 0.0419 | 0.61 | 17344905 |
| Gpr171   | 0.0421 | 1.31 | 17405458 |
| Sh2d4b   | 0.0422 | 0.86 | 17305198 |
| Ciita    | 0.0427 | 0.77 | 17322842 |
| Gif      | 0.0428 | 0.65 | 17357729 |
| Zfp389   | 0.0428 | 0.66 | 17290967 |
| Nr4a3    | 0.0429 | 1.50 | 17413945 |
| C3ar1    | 0.0430 | 1.00 | 17470616 |
| Hspb1    | 0.0431 | 0.70 | 17286958 |
| H2-Q5    | 0.0432 | 0.87 | 17337110 |
| A330050F | 0.0436 | 0.64 | 17339353 |
| Mllt3    | 0.0446 | 0.79 | 17427033 |
| Olfr470  | 0.0446 | 0.98 | 17494772 |
| Spink2   | 0.0455 | 0.62 | 17449064 |
| 1700012D | 0.0465 | 0.72 | 17495168 |
| Emp1     | 0.0471 | 1.20 | 17463781 |
| Fam154b  | 0.0487 | 0.77 | 17492877 |

**Down-regulated**

|          |        |       |          |
|----------|--------|-------|----------|
| Gm6579   | 0.0007 | -0.65 | 17488883 |
| Rab6b    | 0.0007 | -0.70 | 17530231 |
| BC029127 | 0.0008 | -0.77 | 17360909 |
| Vmn1r148 | 0.0008 | -0.62 | 17474785 |
| Entpd6   | 0.0008 | -0.63 | 17377478 |
| Apoa2    | 0.0010 | -1.02 | 17219242 |
| Kank3    | 0.0010 | -0.75 | 17336175 |
| Ppap2a   | 0.0013 | -0.89 | 17289928 |
| Fbxw5    | 0.0013 | -0.92 | 17368079 |
| Trem14   | 0.0014 | -1.15 | 17338378 |
| Mettl22  | 0.0015 | -0.88 | 17322735 |
| Trappc5  | 0.0015 | -0.70 | 17498738 |
| Kctd11   | 0.0016 | -0.71 | 17265026 |
| Pmvk     | 0.0017 | -1.53 | 17399474 |
| G730013B | 0.0021 | -0.93 | 17326188 |
| Fam57a   | 0.0022 | -1.19 | 17253133 |
| 1700010M | 0.0022 | -0.60 | 17548381 |
| Tpm4     | 0.0023 | -0.93 | 17502378 |
| Sgk3     | 0.0023 | -0.92 | 17211043 |
| Gm9897   | 0.0026 | -1.89 | 17434467 |
| Gm4199   | 0.0029 | -1.58 | 17516613 |
| Lilra5   | 0.0030 | -0.75 | 17473292 |
| Prkar2b  | 0.0033 | -1.11 | 17280590 |
| Dhcr24   | 0.0035 | -1.50 | 17416325 |
| Lce1h    | 0.0035 | -0.98 | 17407461 |
| LOC67165 | 0.0036 | -1.16 | 17532584 |
| Apobr    | 0.0037 | -0.74 | 17483048 |

|          |        |       |          |
|----------|--------|-------|----------|
| Gng12    | 0.0038 | -1.02 | 17459250 |
| Gsn      | 0.0040 | -0.65 | 17370209 |
| Sc5d     | 0.0041 | -0.69 | 17525955 |
| Zbtb4    | 0.0044 | -0.73 | 17251728 |
| Lypd6b   | 0.0050 | -0.75 | 17370691 |
| Oxct1    | 0.0050 | -0.71 | 17309802 |
| Golim4   | 0.0051 | -0.70 | 17406002 |
| Cyp51    | 0.0051 | -0.86 | 17445308 |
| Btbd1    | 0.0052 | -0.75 | 17492847 |
| Kif22    | 0.0052 | -0.64 | 17496568 |
| Fdft1    | 0.0053 | -0.78 | 17307588 |
| 2310030N | 0.0054 | -0.87 | 17423215 |
| Zbtb42   | 0.0056 | -0.63 | 17279372 |
| Fam175b  | 0.0059 | -1.16 | 17497143 |
| Gpsm2    | 0.0060 | -0.79 | 17409386 |
| Ebna1bp2 | 0.0067 | -0.86 | 17417791 |
| LOC10086 | 0.0068 | -0.88 | 17547610 |
| Tada3    | 0.0068 | -0.75 | 17469719 |
| Cat      | 0.0070 | -0.64 | 17388803 |
| Mmaa     | 0.0072 | -0.79 | 17510726 |
| Ccdc163  | 0.0073 | -0.61 | 17417492 |
| Nol8     | 0.0075 | -0.60 | 17287185 |
| Fpr1     | 0.0076 | -0.61 | 17341276 |
| Serpini1 | 0.0077 | -0.61 | 17398323 |
| Mir1907  | 0.0079 | -1.07 | 17316977 |
| Prex1    | 0.0083 | -0.66 | 17394582 |
| Cdkn2b   | 0.0086 | -1.13 | 17427155 |
| Nosip    | 0.0088 | -0.62 | 17477679 |
| Gtpbp10  | 0.0088 | -0.96 | 17445381 |
| Dcakd    | 0.0088 | -0.82 | 17547587 |
| Zkscan3  | 0.0088 | -0.89 | 17290921 |
| Lmo4     | 0.0089 | -0.71 | 17410809 |
| Ccdc130  | 0.0091 | -0.83 | 17511112 |
| Spsb2    | 0.0091 | -0.81 | 17462944 |
| Ccdc125  | 0.0093 | -0.71 | 17289497 |
| Pex5     | 0.0093 | -0.72 | 17470689 |
| Megf9    | 0.0096 | -1.14 | 17426497 |
| Csprs    | 0.0098 | -0.66 | 17366355 |
| Sgol2    | 0.0099 | -0.69 | 17212970 |
| Nsdhl    | 0.0099 | -1.06 | 17535434 |
| Ankmy2   | 0.0099 | -1.15 | 17275029 |
| Hist1h2a | 0.0099 | -1.06 | 17291001 |
| Gpr155   | 0.0100 | -0.96 | 17386514 |
| B230120H | 0.0101 | -0.83 | 17371912 |
| Rg9mtd2  | 0.0106 | -0.66 | 17403043 |
| Capza3   | 0.0107 | -0.69 | 17463967 |
| Acot2    | 0.0109 | -0.61 | 17277134 |
| Mdc1     | 0.0109 | -0.85 | 17337250 |
| Acat2    | 0.0110 | -0.78 | 17340967 |

|          |        |       |          |
|----------|--------|-------|----------|
| Frmd8    | 0.0111 | -0.89 | 17361814 |
| Mrpl41   | 0.0112 | -0.69 | 17382350 |
| Idi1     | 0.0114 | -1.06 | 17285056 |
| Mtg1     | 0.0115 | -0.96 | 17484494 |
| Pdgfrb   | 0.0115 | -0.71 | 17351027 |
| Gtpbp5   | 0.0116 | -0.63 | 17380694 |
| Tnfrsf21 | 0.0119 | -0.82 | 17337741 |
| Mir672   | 0.0119 | -0.67 | 17543850 |
| Grwd1    | 0.0120 | -0.68 | 17490984 |
| Bcl3     | 0.0121 | -0.78 | 17487457 |
| 2810008M | 0.0121 | -0.74 | 17289695 |
| Pstpip2  | 0.0122 | -0.64 | 17352036 |
| Tmem55a  | 0.0124 | -0.87 | 17411939 |
| D4Ertd22 | 0.0126 | -0.79 | 17432135 |
| Hyou1    | 0.0127 | -0.69 | 17516564 |
| Tmem202  | 0.0128 | -0.91 | 17527810 |
| Pgm2l1   | 0.0128 | -0.96 | 17480652 |
| Aacs     | 0.0128 | -1.10 | 17442719 |
| Fkbp9    | 0.0131 | -0.95 | 17458911 |
| Asf1b    | 0.0131 | -0.79 | 17503023 |
| Zfp623   | 0.0135 | -0.67 | 17312295 |
| Zfp266   | 0.0137 | -0.69 | 17524411 |
| Cdc37l1  | 0.0137 | -0.63 | 17358486 |
| Atg4d    | 0.0142 | -0.67 | 17515132 |
| Ndufc1   | 0.0143 | -0.70 | 17405133 |
| D9Ertd40 | 0.0144 | -0.74 | 17523457 |
| Dnajb5   | 0.0145 | -0.63 | 17413191 |
| Rab31    | 0.0150 | -0.81 | 17346749 |
| Gm19918  | 0.0154 | -0.82 | 17218446 |
| Mvd      | 0.0157 | -1.00 | 17513681 |
| Camta2   | 0.0158 | -0.72 | 17265340 |
| Zfp426   | 0.0160 | -1.36 | 17524393 |
| Mapk14   | 0.0160 | -0.97 | 17335364 |
| Zfp808   | 0.0168 | -0.76 | 17288051 |
| 1110057K | 0.0168 | -0.77 | 17273899 |
| Lrig3    | 0.0168 | -0.60 | 17237811 |
| Kdelc1   | 0.0169 | -0.64 | 17222694 |
| Ppt2     | 0.0169 | -1.05 | 17343897 |
| Blvrb    | 0.0169 | -1.05 | 17475580 |
| Fads2    | 0.0170 | -0.98 | 17362595 |
| 3110052M | 0.0171 | -0.74 | 17333955 |
| Amac1    | 0.0173 | -0.61 | 17264940 |
| Ppp1ca   | 0.0173 | -0.73 | 17356182 |
| Krtap5-5 | 0.0174 | -0.68 | 17498072 |
| Dcpp3    | 0.0175 | -1.12 | 17334178 |
| Slc39a9  | 0.0175 | -0.63 | 17276854 |
| Vmn2r16  | 0.0181 | -0.82 | 17440328 |
| Slc48a1  | 0.0182 | -0.60 | 17314556 |
| Spint2   | 0.0182 | -0.74 | 17488806 |

|           |        |       |          |
|-----------|--------|-------|----------|
| Chpf2     | 0.0185 | -0.61 | 17435403 |
| Fam129a   | 0.0187 | -0.65 | 17218186 |
| Pter      | 0.0194 | -0.71 | 17367036 |
| Ehd2      | 0.0197 | -0.64 | 17486807 |
| Dnajc24   | 0.0200 | -0.73 | 17389066 |
| Olfr1269  | 0.0205 | -1.10 | 17388016 |
| Eef1e1    | 0.0208 | -1.23 | 17291964 |
| Olfr52    | 0.0208 | -0.61 | 17387646 |
| LOC10086  | 0.0212 | -0.60 | 17547684 |
| Ppm1n     | 0.0214 | -0.76 | 17487201 |
| Cul2      | 0.0216 | -0.97 | 17348079 |
| Myo1f     | 0.0216 | -0.72 | 17336114 |
| Klk1b8    | 0.0216 | -0.82 | 17477292 |
| Zfp958    | 0.0219 | -1.07 | 17498860 |
| Polr3gl   | 0.0220 | -1.09 | 17408074 |
| Sqle      | 0.0224 | -1.28 | 17311807 |
| Tada2b    | 0.0226 | -0.65 | 17447446 |
| Rps6ka1   | 0.0226 | -0.96 | 17431101 |
| Alas1     | 0.0228 | -0.66 | 17530653 |
| AF366264  | 0.0232 | -0.63 | 17507665 |
| Snx11     | 0.0232 | -1.29 | 17268338 |
| Haus8     | 0.0237 | -0.67 | 17510264 |
| D3Erttd25 | 0.0241 | -0.70 | 17396966 |
| Isca2     | 0.0242 | -0.70 | 17277294 |
| Gm10033   | 0.0245 | -0.67 | 17509809 |
| D330045A  | 0.0246 | -1.01 | 17538079 |
| 4930483K  | 0.0247 | -1.01 | 17242140 |
| Rdx       | 0.0248 | -0.61 | 17517248 |
| Supt3h    | 0.0250 | -0.64 | 17337872 |
| Mrps31    | 0.0252 | -1.41 | 17499922 |
| Bin3      | 0.0252 | -0.62 | 17301722 |
| Dusp12    | 0.0255 | -1.03 | 17219196 |
| Ap3s2     | 0.0255 | -1.44 | 17492457 |
| Kazald1   | 0.0256 | -0.67 | 17359816 |
| Klf7      | 0.0259 | -0.68 | 17223766 |
| 2210408F  | 0.0260 | -0.94 | 17456974 |
| Ehhadh    | 0.0263 | -1.14 | 17329220 |
| Akr1b8    | 0.0264 | -1.23 | 17457128 |
| Ccdc90b   | 0.0267 | -0.74 | 17480192 |
| Agtrap    | 0.0267 | -0.63 | 17432895 |
| St3gal3   | 0.0270 | -0.87 | 17429008 |
| Exosc3    | 0.0271 | -0.62 | 17424937 |
| 9030418K  | 0.0273 | -0.94 | 17380604 |
| Chmp6     | 0.0273 | -0.97 | 17272939 |
| Gm2012    | 0.0275 | -0.62 | 17540739 |
| Fam194a   | 0.0276 | -0.61 | 17405420 |
| Tmsb10    | 0.0276 | -0.63 | 17467831 |
| F630028O  | 0.0279 | -1.67 | 17536383 |
| Ubtf      | 0.0280 | -0.67 | 17270134 |

|          |        |       |          |
|----------|--------|-------|----------|
| Fam125a  | 0.0281 | -0.62 | 17502221 |
| Cyb5b    | 0.0285 | -0.66 | 17505252 |
| Phox2a   | 0.0285 | -0.62 | 17480955 |
| Mrpl20   | 0.0286 | -1.06 | 17422697 |
| Aph1a    | 0.0286 | -0.75 | 17400437 |
| Car5b    | 0.0290 | -0.80 | 17545936 |
| Matn2    | 0.0292 | -0.67 | 17310922 |
| Lix1l    | 0.0293 | -0.98 | 17400622 |
| Oaz2     | 0.0293 | -0.97 | 17548287 |
| Alg3     | 0.0295 | -0.94 | 17329151 |
| Snord15b | 0.0298 | -1.20 | 17493681 |
| Snupn    | 0.0300 | -1.26 | 17517608 |
| Ephb1    | 0.0300 | -0.66 | 17520830 |
| Pkp4     | 0.0301 | -0.74 | 17370977 |
| Ehbp1    | 0.0303 | -0.74 | 17260968 |
| Naa38    | 0.0303 | -0.81 | 17456285 |
| Tspan6   | 0.0308 | -0.63 | 17544385 |
| Dhcr24   | 0.0309 | -0.87 | 17427799 |
| 2900006K | 0.0310 | -0.69 | 17277251 |
| 4930455G | 0.0310 | -1.23 | 17421150 |
| Hsd17b7  | 0.0310 | -1.15 | 17229466 |
| Usp4     | 0.0314 | -0.68 | 17521686 |
| LOC10086 | 0.0314 | -1.00 | 17548153 |
| Yif1a    | 0.0317 | -0.68 | 17356372 |
| Aagab    | 0.0317 | -0.70 | 17518256 |
| Hmgcs1   | 0.0317 | -1.14 | 17290173 |
| 2010321M | 0.0319 | -0.68 | 17518417 |
| Nedd1    | 0.0319 | -0.72 | 17244244 |
| Dock8    | 0.0319 | -0.61 | 17358274 |
| Rdbp     | 0.0320 | -0.74 | 17336738 |
| Pmm1     | 0.0323 | -0.66 | 17319554 |
| Frg1     | 0.0325 | -0.70 | 17508968 |
| Clec1b   | 0.0327 | -0.84 | 17463520 |
| Gm16023  | 0.0329 | -0.75 | 17433810 |
| Vmn1r207 | 0.0329 | -0.69 | 17291089 |
| Rai12    | 0.0332 | -0.79 | 17265111 |
| Ubl4     | 0.0334 | -0.86 | 17542662 |
| Cd22     | 0.0335 | -0.63 | 17489320 |
| G6pc3    | 0.0336 | -0.90 | 17256896 |
| Ndor1    | 0.0336 | -1.06 | 17382459 |
| Pacrgl   | 0.0339 | -1.35 | 17437355 |
| Cd300lb  | 0.0342 | -0.70 | 17271710 |
| Creld2   | 0.0343 | -0.65 | 17313998 |
| Chst15   | 0.0344 | -0.90 | 17497076 |
| Dgkz     | 0.0344 | -0.76 | 17373448 |
| Cyp4f13  | 0.0346 | -0.87 | 17343505 |
| Ggps1    | 0.0349 | -0.65 | 17290729 |
| Tmem222  | 0.0350 | -1.19 | 17430989 |
| Afg3l1   | 0.0351 | -0.88 | 17506661 |

|          |        |       |          |
|----------|--------|-------|----------|
| Ybey     | 0.0355 | -0.69 | 17242133 |
| Sowahd   | 0.0356 | -0.69 | 17534135 |
| Ndufs8   | 0.0358 | -0.66 | 17361032 |
| Hmgcr    | 0.0360 | -0.82 | 17295233 |
| Hist1h4i | 0.0365 | -1.11 | 17291053 |
| Fads1    | 0.0366 | -1.08 | 17357460 |
| Rnf219   | 0.0366 | -0.73 | 17309293 |
| Hyal1    | 0.0369 | -0.68 | 17521428 |
| Slc11a1  | 0.0370 | -0.89 | 17214197 |
| Mrpl21   | 0.0377 | -0.82 | 17355903 |
| Napepld  | 0.0384 | -1.30 | 17445860 |
| Cdh11    | 0.0385 | -0.82 | 17512153 |
| Fdps     | 0.0385 | -0.88 | 17406908 |
| Abcc4    | 0.0389 | -1.12 | 17309420 |
| Creb1    | 0.0390 | -0.67 | 17213676 |
| Fam3c    | 0.0390 | -0.96 | 17465062 |
| Aldh1l1  | 0.0391 | -0.95 | 17460831 |
| Tm7sf3   | 0.0394 | -0.72 | 17472868 |
| Sfxn3    | 0.0394 | -0.66 | 17359803 |
| Cntln    | 0.0395 | -0.82 | 17415076 |
| Pid1     | 0.0398 | -0.91 | 17224971 |
| Gm11426  | 0.0399 | -0.74 | 17254085 |
| Slc39a14 | 0.0402 | -0.91 | 17308299 |
| 2210009G | 0.0402 | -0.68 | 17376834 |
| Cpeb1    | 0.0403 | -0.98 | 17492754 |
| Ndufs6   | 0.0406 | -0.65 | 17548616 |
| Pla2g4a  | 0.0409 | -0.91 | 17227828 |
| Mrpl36   | 0.0411 | -0.63 | 17294244 |
| Tbc1d22a | 0.0413 | -0.62 | 17313958 |
| 4833417C | 0.0414 | -0.96 | 17255476 |
| Pbx3     | 0.0416 | -0.84 | 17384234 |
| Napsa    | 0.0416 | -0.69 | 17477508 |
| Tnfrsf10 | 0.0421 | -0.62 | 17301697 |
| D19Bwg13 | 0.0421 | -1.00 | 17363683 |
| Zfp775   | 0.0421 | -0.92 | 17458333 |
| Tanc2    | 0.0422 | -0.97 | 17257405 |
| Il15     | 0.0425 | -0.66 | 17510856 |
| Rnf113a2 | 0.0428 | -0.76 | 17277265 |
| Ppfibp2  | 0.0428 | -1.01 | 17481556 |
| Pnpla1   | 0.0429 | -0.70 | 17342940 |
| Josd2    | 0.0429 | -0.92 | 17477486 |
| Sowaha   | 0.0430 | -0.70 | 17262669 |
| Chek2    | 0.0434 | -0.80 | 17440575 |
| Kctd12b  | 0.0436 | -0.88 | 17545488 |
| BC003331 | 0.0438 | -0.82 | 17227872 |
| 1110006O | 0.0438 | -1.22 | 17451746 |
| Dtymk    | 0.0444 | -0.86 | 17225785 |
| Oxct2a   | 0.0444 | -1.13 | 17429685 |
| D430020J | 0.0445 | -1.45 | 17284696 |

|          |        |       |          |
|----------|--------|-------|----------|
| Gpr89    | 0.0448 | -1.03 | 17408135 |
| Ppp1r14b | 0.0454 | -0.71 | 17356987 |
| Zfp574   | 0.0455 | -0.62 | 17475170 |
| Rragd    | 0.0458 | -0.61 | 17412539 |
| Bnip3    | 0.0460 | -0.68 | 17497421 |
| D10Jhu81 | 0.0460 | -0.71 | 17242416 |
| Dusp6    | 0.0460 | -1.06 | 17236882 |
| Maoa     | 0.0461 | -0.74 | 17533474 |
| Fgr      | 0.0463 | -0.73 | 17419483 |
| Pex19    | 0.0463 | -0.82 | 17219489 |
| Adhfe1   | 0.0465 | -0.75 | 17211004 |
| Serinc5  | 0.0466 | -0.72 | 17289103 |
| Eri3     | 0.0467 | -0.83 | 17417679 |
| Znhit6   | 0.0469 | -1.13 | 17403423 |
| Ldlr     | 0.0469 | -0.63 | 17515315 |
| Erich1   | 0.0471 | -0.68 | 17507682 |
| Mxi1     | 0.0477 | -0.70 | 17360331 |
| Lpin1    | 0.0481 | -0.76 | 17280062 |
| Vmn1r183 | 0.0481 | -0.73 | 17474878 |
| Cnm4     | 0.0484 | -0.94 | 17211822 |
| Tbrg1    | 0.0484 | -1.00 | 17525661 |
| Rabl3    | 0.0485 | -1.53 | 17325489 |
| Rras     | 0.0488 | -0.70 | 17477670 |
| Mast3    | 0.0489 | -0.63 | 17510166 |
| Zfp433   | 0.0489 | -0.96 | 17235831 |
| Slc52a3  | 0.0489 | -0.64 | 17377651 |
| Rpl37    | 0.0495 | -1.36 | 17309899 |
| Mrpl14   | 0.0495 | -0.66 | 17337955 |
| Endog    | 0.0496 | -0.81 | 17369120 |
| Xpnpep3  | 0.0500 | -0.79 | 17313260 |
